# Supplementary material for: Psychosocial Determinants of Lifestyle Change after a Cancer Diagnosis: A Systematic Review of the Literature
Source: MDPI journal article supplement (doi:10.3390/cancers14082026), 2022-04-16
Supplement: s1 [file s1]

**Table S3.** Overview of quantitative studies assessing psychosocial determinants of changes in smoking cessation among cancer survivors (n=12).

| First author (year) Country        | Study design                                                                                | Sample Characteristics (at baseline)                                                           | Psychosocial variables Type(s); Assessed at; Assessed with                                                                                                                                                                                                                                                       | Lifestyle Assessment instruments Baseline; Change (period)                                                                                                                                                                                                                                     | Findings                                                                                                                                                                                                                                                                                                                                                               | Comments |
|------------------------------------|---------------------------------------------------------------------------------------------|------------------------------------------------------------------------------------------------|------------------------------------------------------------------------------------------------------------------------------------------------------------------------------------------------------------------------------------------------------------------------------------------------------------------|------------------------------------------------------------------------------------------------------------------------------------------------------------------------------------------------------------------------------------------------------------------------------------------------|------------------------------------------------------------------------------------------------------------------------------------------------------------------------------------------------------------------------------------------------------------------------------------------------------------------------------------------------------------------------|----------|
| Bidstrup et al. (2013)[93] Denmark | Cohort study                                                                                | 449 women with breast cancer                                                                   | Socio-demographic: Marital status (categorized into never married, divorced or widowed, and married or with registered partner)., and educational status (categorized into basic school/high school, vocational training and higher education).                                                                  | At both baseline and follow-up, participants were asked to indicate how much they smoked per day in terms of cigarettes (1 g tobacco/cigarette), cigars (4.5 g tobacco/cigar), cheroots (3 g tobacco/cheroot), and pipes (3 g tobacco/pipe), and these were summed as grams of tobacco per day | No significant changes in tobacco consumption by level of education, and marital status.                                                                                                                                                                                                                                                                               |          |
|                                    |                                                                                             | Mean (SD) age 56.7 (4.1) years                                                                 |                                                                                                                                                                                                                                                                                                                  |                                                                                                                                                                                                                                                                                                |                                                                                                                                                                                                                                                                                                                                                                        |          |
|                                    |                                                                                             | Mean BMI 25.3 kg/m² at baseline                                                                |                                                                                                                                                                                                                                                                                                                  |                                                                                                                                                                                                                                                                                                |                                                                                                                                                                                                                                                                                                                                                                        |          |
|                                    |                                                                                             |                                                                                                |                                                                                                                                                                                                                                                                                                                  | 68% did not smoke at baseline and this significantly increased to 74% at follow-up (p< .001)                                                                                                                                                                                                   |                                                                                                                                                                                                                                                                                                                                                                        |          |
| Cooley et al. (2007)[52] USA       | Prospective longitudinal study                                                              | 230 women with lung cancer                                                                     | Socio-demographic: Age, marital status, educational level, and smokers in household<br><br>Intra-individual: Depression (CES-D, >15)                                                                                                                                                                             | Baseline, 3 and 6 months Continued smoking                                                                                                                                                                                                                                                     | Age (OR .94, p =.01), household member smoking (OR 3.55, p = .033) and depression (OR 3.9, p =.014) were associated with continued smoking                                                                                                                                                                                                                             |          |
|                                    |                                                                                             | Mean (SD) age 65 (11.65) years                                                                 |                                                                                                                                                                                                                                                                                                                  | Smoking status (current, former, and never) was determined through self-report and biochemical verification with urinary cotinine.                                                                                                                                                             |                                                                                                                                                                                                                                                                                                                                                                        |          |
|                                    |                                                                                             | Mean (SD) time since diagnosis 23.04 (15.5) months                                             |                                                                                                                                                                                                                                                                                                                  | Of those with complete data (n=165), 7% were smoking at baseline, 7% were smoking at 3 months follow-up, and 8% were smoking at 6 months.                                                                                                                                                      |                                                                                                                                                                                                                                                                                                                                                                        |          |
|                                    |                                                                                             | 13% (30/230) of women with lung cancer were never-smokers and 87% (200/230) were ever-smokers. |                                                                                                                                                                                                                                                                                                                  |                                                                                                                                                                                                                                                                                                |                                                                                                                                                                                                                                                                                                                                                                        |          |
| Emmons et al. (2009)[53] USA       | randomized control trial with two conditions, peer phone counseling (PC) and self-help (SH) | 566 childhood cancer survivors having completed long term follow-up                            | Socio-demographic: Age, sex, race, ethnicity, socioeconomic status, education, employment history, marital status, and medical history.<br><br>Intra-individual: Self-efficacy was defined using single-item measures of confidence in one's ability to quit smoking in at 1 and 6 months, and confidence in not | Smoking status based on 7-day point-prevalence smoking status at the end of the intervention and at long-term follow-up.                                                                                                                                                                       | 19% of all participants reporting having quit smoking at the LT follow-up. Quit rates at LT follow-up were significantly higher in the PC condition compared to SH (20.6% v 17.6%; p =.0003). Significant relationships between smoking status at LT follow-up and educational level (p = .017), situational confidence (p < .001), short-term self-efficacy (p <.01), |          |
|                                    |                                                                                             | Intervention group: Mean age 31 (SD 6.5) 50% female                                            |                                                                                                                                                                                                                                                                                                                  | Quit attempts were evaluated among continuous smokers and relapsers (categorized into 0, 1 to 2, 2 to 5, and 6+ attempts).                                                                                                                                                                     |                                                                                                                                                                                                                                                                                                                                                                        |          |
|                                    |                                                                                             | Control group: Mean age 31 (SD 6.9) 52% female                                                 |                                                                                                                                                                                                                                                                                                                  |                                                                                                                                                                                                                                                                                                |                                                                                                                                                                                                                                                                                                                                                                        |          |

|                            |                                                     |                                                                                                                                                                                                              |                                                                                                                                                                                                                                                                                                                                                                                                                                        |                                                                                                                                                          |                                                                                                                                                                                                                                                                                                                                                                                                                                                                                                                                                                                                                                                                                                                              |
|----------------------------|-----------------------------------------------------|--------------------------------------------------------------------------------------------------------------------------------------------------------------------------------------------------------------|----------------------------------------------------------------------------------------------------------------------------------------------------------------------------------------------------------------------------------------------------------------------------------------------------------------------------------------------------------------------------------------------------------------------------------------|----------------------------------------------------------------------------------------------------------------------------------------------------------|------------------------------------------------------------------------------------------------------------------------------------------------------------------------------------------------------------------------------------------------------------------------------------------------------------------------------------------------------------------------------------------------------------------------------------------------------------------------------------------------------------------------------------------------------------------------------------------------------------------------------------------------------------------------------------------------------------------------------|
|                            |                                                     |                                                                                                                                                                                                              | smoking in a variety of situations. <sup>23</sup>                                                                                                                                                                                                                                                                                                                                                                                      |                                                                                                                                                          | and <i>readiness to change</i> ( $p = .02$ ). Self-efficacy, and readiness to change was associated with quit attempts                                                                                                                                                                                                                                                                                                                                                                                                                                                                                                                                                                                                       |
|                            |                                                     |                                                                                                                                                                                                              | Readiness to quit smoking was assessed using the stages of change algorithm. <sup>24</sup>                                                                                                                                                                                                                                                                                                                                             |                                                                                                                                                          |                                                                                                                                                                                                                                                                                                                                                                                                                                                                                                                                                                                                                                                                                                                              |
|                            |                                                     |                                                                                                                                                                                                              | Depressed mood was assessed using a single item reflecting feelings of being downhearted and blue in the previous 2 weeks                                                                                                                                                                                                                                                                                                              |                                                                                                                                                          |                                                                                                                                                                                                                                                                                                                                                                                                                                                                                                                                                                                                                                                                                                                              |
| Foshee et al. (2017)[54]   | prospective, randomized, controlled trial           | 52 patients with <i>laryngology</i> successfully completed the long-term follow-up phone surveys                                                                                                             | <i>Intra-individual:</i> Motivation and readiness to quit smoking were assessed using a Likert scale ranging from 1 (not planning to quit) to 4 (actively trying to quit)                                                                                                                                                                                                                                                              | The follow-up phone surveys aimed to collect information on smoking status                                                                               | Those patients who were actively trying to quit at study enrollment appeared more likely to successfully quit smoking compared with those participants who would only consider quitting (35.7% vs. 20%), but this difference was not significant ( $p = 0.70$ ).                                                                                                                                                                                                                                                                                                                                                                                                                                                             |
| USA                        |                                                     | 73% 50 years or older<br><br>55.8% female                                                                                                                                                                    |                                                                                                                                                                                                                                                                                                                                                                                                                                        |                                                                                                                                                          |                                                                                                                                                                                                                                                                                                                                                                                                                                                                                                                                                                                                                                                                                                                              |
| Gritz et al. (1998)[55]    | Intervention study RCT                              | 83 Current smokers and recent quitters (individuals who stopped smoking within the year prior to diagnosis), newly diagnosed with first primary squamous cell carcinomas (SCC) of the <i>head and neck</i> . | <i>Baseline</i><br>Stage of change, self-efficacy, mental distress (Profile of Mood States)<br><i>Follow-up (1, 6, 12 months)</i><br>The measures collected at baseline were repeated at each assessment. Additional follow-up measures included an assessment of cessation techniques, coping behaviors to resist smoking, social support, self-efficacy for staying off cigarettes, withdrawal and craving, and the relapse episode. | Relapse was reported retrospectively at the follow-up most proximal to the event (1, 6, or 12 months).                                                   | 21 of the 83 patients relapsed.<br>The higher the <i>stage of change</i> (readiness to quit), the less likely the patient is to relapse (OR= 0.17, 95% CI: 0.06, 0.50).<br><i>Coping behaviors</i> used to resist smoking did not differ significantly between groups.<br>At the one-month follow-up, high levels of positive <i>supportive behaviors</i> and low levels of <i>unsupportive behaviors</i> were reported overall, with few between-group differences.<br>At the one-month follow-up, continuous abstainers expressed significantly higher levels of confidence than patients who relapsed in the ability to stay off cigarettes for the next 1 ( $p = .001$ ), 6 ( $p = .013$ ), and 12 ( $p = .01$ ) months. |
| USA                        | Physician-delivered, smoking cessation intervention | Mean age 57.1 years<br><br>34.8% female                                                                                                                                                                      |                                                                                                                                                                                                                                                                                                                                                                                                                                        |                                                                                                                                                          |                                                                                                                                                                                                                                                                                                                                                                                                                                                                                                                                                                                                                                                                                                                              |
| Kashigar et al. (2013)[71] | Longitudinal observational study                    | 295 newly diagnosed <i>head and neck</i> cancer patients<br><br>Mean time since diagnosis 2.9 months at baseline<br><br>Follow-up questionnaire a mean 24.5 months (range, 6-                                | <i>Inter-individual:</i> Social support as defined by Pomerleau et al. (2004), and social smoking environment                                                                                                                                                                                                                                                                                                                          | The follow-up questionnaire assessed the date last smoked and current smoking habits.<br><br>49% were smokers at diagnosis and 50% quit after diagnosis. | Among current smokers, patients were more likely to quit by the time of follow-up if they had a spouse who did not smoke (OR = 4.25, 95% CI [1.70-10.6]), and fewer peers who smoked (OR =2.32, 95% CI [1.00-5.37]). Social support was not a significant predictor of quitting smoking.                                                                                                                                                                                                                                                                                                                                                                                                                                     |
| Canada                     |                                                     |                                                                                                                                                                                                              |                                                                                                                                                                                                                                                                                                                                                                                                                                        |                                                                                                                                                          |                                                                                                                                                                                                                                                                                                                                                                                                                                                                                                                                                                                                                                                                                                                              |

|                           |                                                                                                                                 |                                                                                                                                                                                                                                                                                                                               |                                                                                                                                                                                                                                                                                                                                                   |                                                                                                                                                                                                                                                                                                                                                                                |                                                                                                                                                                                                                                                                                                                                                                                                                                                                       |                                                                                                                                                        |
|---------------------------|---------------------------------------------------------------------------------------------------------------------------------|-------------------------------------------------------------------------------------------------------------------------------------------------------------------------------------------------------------------------------------------------------------------------------------------------------------------------------|---------------------------------------------------------------------------------------------------------------------------------------------------------------------------------------------------------------------------------------------------------------------------------------------------------------------------------------------------|--------------------------------------------------------------------------------------------------------------------------------------------------------------------------------------------------------------------------------------------------------------------------------------------------------------------------------------------------------------------------------|-----------------------------------------------------------------------------------------------------------------------------------------------------------------------------------------------------------------------------------------------------------------------------------------------------------------------------------------------------------------------------------------------------------------------------------------------------------------------|--------------------------------------------------------------------------------------------------------------------------------------------------------|
|                           |                                                                                                                                 | 43 months) after the baseline questionnaire.                                                                                                                                                                                                                                                                                  |                                                                                                                                                                                                                                                                                                                                                   |                                                                                                                                                                                                                                                                                                                                                                                |                                                                                                                                                                                                                                                                                                                                                                                                                                                                       |                                                                                                                                                        |
|                           |                                                                                                                                 | 246 cancer patients                                                                                                                                                                                                                                                                                                           |                                                                                                                                                                                                                                                                                                                                                   |                                                                                                                                                                                                                                                                                                                                                                                |                                                                                                                                                                                                                                                                                                                                                                                                                                                                       |                                                                                                                                                        |
| Schnoll et al. (2011)[56] | double-blind, placebo-controlled smoking cessation                                                                              | 35% tobacco-related (head and neck or lung), 21% breast, 15% prostate, 9% lymphoma, 5% colorectal, 4% kidney, pancreas or liver, 3% genitourinary, 3% esophageal, and 5% other                                                                                                                                                | <i>Socio-demographic:</i><br>Age, and gender                                                                                                                                                                                                                                                                                                      | 7-day point-prevalence abstinence at Week 12 and 27, confirmed with breath CO (abstinence = B 10 ppm).<br><br>The quit rate at week 12 was 26% and the quit rate at week 27 was 18%                                                                                                                                                                                            | 12 week cessation was associated with <i>age</i> (OR = 1.06, <i>p</i> = 0.01).<br>27 week cessation was associated with <i>age</i> (OR = 1.04, <i>p</i> = .03) and <i>gender</i> (M) (OR = 0.47, <i>p</i> = 0.04).                                                                                                                                                                                                                                                    | Participants included in this study were self-identified smokers and interested in quitting and had to be smoking at least 2 cigarettes/day on average |
|                           |                                                                                                                                 | 48% female                                                                                                                                                                                                                                                                                                                    |                                                                                                                                                                                                                                                                                                                                                   |                                                                                                                                                                                                                                                                                                                                                                                |                                                                                                                                                                                                                                                                                                                                                                                                                                                                       |                                                                                                                                                        |
|                           |                                                                                                                                 | Mean age 54.8 years                                                                                                                                                                                                                                                                                                           |                                                                                                                                                                                                                                                                                                                                                   |                                                                                                                                                                                                                                                                                                                                                                                |                                                                                                                                                                                                                                                                                                                                                                                                                                                                       |                                                                                                                                                        |
| Schnoll et al. (2010)[57] | double-blind placebo-controlled randomized trial<br><br>placebo or bupropion, stratifying by pre-treatment depression symptoms. | 246 cancer patients<br><br>35% tobacco-related (head and neck or lung), 21% breast, 15% prostate, 9% lymphoma, 5% colorectal, 4% kidney, pancreas or liver, 3% genitourinary, 3% esophageal, and 5% other<br><br>48% female<br><br>Mean age 54.8 years                                                                        | <i>Intra-individual:</i><br>Depression (CES-D)<br>Fifty-five patients (22% of the sample) had CES-D scores of >16.                                                                                                                                                                                                                                | 7-day point-prevalence abstinence at Week 12 and 27, confirmed with breath CO (abstinence = B 10 ppm). Daily smoking was also assessed using a validated time-line follow-back method<br><br>Intervention group:<br>Week 12: 27.2% abstinence rate<br>Week 27: 18.4% abstinence rate<br><br>Control group:<br>Week 12: 24.2% abstinence rate<br>Week 27: 17.4% abstinence rate | Patients with <i>depression symptoms</i> reported significantly lower abstinence rates vs. patients without <i>depression symptoms</i> (OR = .14, 95% CI: 0.02–0.80, <i>p</i> = .03).<br>At Week 12, 10.9% of depression symptom patients were abstinent vs. 29.8% of the non-depression symptom patients ( <i>p</i> = .002).<br>At Week 27, 10.9% of depression symptom patients were abstinent, vs. 19.9% of the non-depression symptom patients ( <i>p</i> = .11). | Participants were included if they smoked more than 2 cigarettes/day on average.                                                                       |
| Schnoll et al. (2005)[58] | Randomized Pilot Study                                                                                                          | 109 patient with <i>head and neck</i> or <i>lung</i> cancer<br><br>Intervention group:<br>Mean (SD) time since diagnosis 24.5 (33.5) months<br>51.9% female<br>Mean (SD) age 58.7 (9.0) years<br><br>Control group:<br>Mean (SD) time since diagnosis 11.33 (19.95) months<br>40.4% female<br>Mean (SD) age 57.7 (10.1) years | <i>Intra-individual:</i><br>Self-efficacy (scale is based on Marshall's general health-related self-efficacy survey)<br><br>Perceptions of risk. (Seven Likert-type items)<br><br>The pros and cons of quitting (Eight items)<br><br>Fatalism (The Powe Fatalism Inventory)<br>Emotional Distress (POMS)<br><br>Stage of change (quit motivation) | Smoking status was assessed by asking patients if they smoked a cigarette, even a puff, in the last 30 days.<br><br>46.2% reported quitting smoking at 1-month follow-up<br>41.1% reported quit smoking at 3-month follow-up                                                                                                                                                   | Cessation at 1 month was associated with <i>quit motivation</i> (OR = 3.18, 95% CI = 1.51, 6.71).<br><br>Cessation at 3 months was associated with <i>quit motivation</i> (OR = 3.26, 95% CI = 1.46, 7.30) and <i>cons of quitting</i> (OR = 0.29, 95% CI = 0.08, 1.01)                                                                                                                                                                                               | A biochemical verification of smoking status was not conducted                                                                                         |
| Simmons et al. (2020)[59] | RCT                                                                                                                             | 412 patients newly diagnosed with cancer who had                                                                                                                                                                                                                                                                              | <i>Socio-demographic:</i><br>Age, gender, race,                                                                                                                                                                                                                                                                                                   | Follow-up at 2, 6 and 12 months                                                                                                                                                                                                                                                                                                                                                | Of the 12 prospective moderators only <i>marital/</i>                                                                                                                                                                                                                                                                                                                                                                                                                 | Control condition consisted of usual care                                                                                                              |

|                          |                                                                                       |                                                                                                                                                             |                                                                                                                                                                                                                                                                                                             |                                                                                                                                                                                                                                                                                         |                                                                                                                                                                                                                                                                                                                                                                                                                                                                                          |
|--------------------------|---------------------------------------------------------------------------------------|-------------------------------------------------------------------------------------------------------------------------------------------------------------|-------------------------------------------------------------------------------------------------------------------------------------------------------------------------------------------------------------------------------------------------------------------------------------------------------------|-----------------------------------------------------------------------------------------------------------------------------------------------------------------------------------------------------------------------------------------------------------------------------------------|------------------------------------------------------------------------------------------------------------------------------------------------------------------------------------------------------------------------------------------------------------------------------------------------------------------------------------------------------------------------------------------------------------------------------------------------------------------------------------------|
| USA                      | Smoking relapse prevention intervention                                               | recently quit smoking<br><br>Mean (SD) age 55.0 (10.8) years<br><br>52.0% female                                                                            | marital status, and education.<br><br><i>Intra-individual:</i> Fears of cancer recurrence, risk perception of smoking after cancer, depressive symptoms (CES-D), cessation self-efficacy (7-point Likert scale assessing confidence in not smoking within the next 6 months), pain (BPI), and fatigue (BFI) | Self-reported 7-day point prevalence abstinence (ie, no smoking within the previous 7 days).<br><br>Sub-sample: breath carbon monoxide (CO) samples collected via a portable CO monitor.<br><br>2 months: 73% abstinence rate<br>6 months: 67% abstinence rate                          | <i>partnered status</i> demonstrated a marginally significant interaction with condition ( $P = .07$ ) on abstinence rates over the 2 assessments                                                                                                                                                                                                                                                                                                                                        |
| Streck et al. (2021)[60] | RCT<br>Telephone counseling plus cessation medication treatment (Intensive Treatment) | 303 newly diagnosed cancer patients<br><br>Median (IQR) age 59 (52 – 65) years<br><br>56% female                                                            | <i>Socio-demographic:</i> Sex, age, race, and education.<br><br><i>Intra-individual:</i> Stress coping (single item), perceived stress (Perceived Stress Scale), and psychological distress (Distress Thermometer Anxiety symptoms (GAD-7)).                                                                | Self-reported past 7-day point prevalence tobacco abstinence. Those who reported abstinence were mailed a saliva kit with instructions to return a sample to assess for cotinine to biochemically verify abstinence.                                                                    | <i>Stress coping</i> ( $p < .001$ ), <i>perceived stress</i> ( $p < .001$ ), <i>distress</i> ( $p < .001$ ) and <i>anxiety</i> ( $p < .001$ ) at 3 months were associated with biochemically confirmed smoking abstinence at 6 months.<br><br>Participants were included if they smoked a cigarette in the past 30 days and were willing to consider attempting to quit smoking.<br><br>Control condition consisted of short-term counseling plus medication advise (standard treatment) |
| Yang et al. (2021)[95]   | prospective observational design                                                      | 133 newly diagnosed people with lung cancer who recently quit smoking or were current smokers.<br><br>Mean (SD) age 63.40 (11.70) years<br><br>10.5% female | <i>Socio-demographic:</i> Age, sex, education level, marital status, income Status, and second-hand smoke exposure at home<br><br><i>Intra-individual:</i> Self-efficacy for not smoking (Quitting Self-Efficacy Questionnaire), Anxiety and depression (HADS),                                             | After diagnosis and then every month after diagnosis for a total of 6 months, participants were asked whether they smoked during the previous month (yes/no). Patients' levels of exhaled carbon monoxide (CO) were measured at T0 to confirm the self-reported data on smoking status. | Patients who were younger age ( $OR = 0.95, p = 0.026$ ), exposed to second-hand smoke ( $OR = 3.35, p = 0.012$ ), and lower self-efficacy for not smoking ( $OR = 0.96, p = 0.011$ ) were more likely to belong to the class of "indecisive for abstinence."                                                                                                                                                                                                                            |
