# Supplementary material for: Psychosocial Determinants of Lifestyle Change after a Cancer Diagnosis: A Systematic Review of the Literature
Source: MDPI journal article supplement (doi:10.3390/cancers14082026), 2022-04-16
Supplement: s1 [file s1]

**Table S2.** Overview of quantitative studies assessing psychosocial determinants of changes in diet among cancer survivors (n=21).

| First author<br>(year)<br>Country            | Study<br>design                      | Sample<br>Characteristics<br>(at baseline)                                                  | Psychosocial<br>variables                                                                                                                                                                                                                                                                                                                                                                                                                                                                                                  | Lifestyle                                                                                                                                                                                                                                                                                                                                                                    | Findings                                                                                                                                                                                                                                                                                                                                                    | Comments |
|----------------------------------------------|--------------------------------------|---------------------------------------------------------------------------------------------|----------------------------------------------------------------------------------------------------------------------------------------------------------------------------------------------------------------------------------------------------------------------------------------------------------------------------------------------------------------------------------------------------------------------------------------------------------------------------------------------------------------------------|------------------------------------------------------------------------------------------------------------------------------------------------------------------------------------------------------------------------------------------------------------------------------------------------------------------------------------------------------------------------------|-------------------------------------------------------------------------------------------------------------------------------------------------------------------------------------------------------------------------------------------------------------------------------------------------------------------------------------------------------------|----------|
|                                              |                                      |                                                                                             | Type(s); Assessed<br>at;<br>Assessed with                                                                                                                                                                                                                                                                                                                                                                                                                                                                                  | Assessment<br>instruments<br>Baseline; Change<br>(period)                                                                                                                                                                                                                                                                                                                    |                                                                                                                                                                                                                                                                                                                                                             |          |
| Alfano et al.<br>(2009)[26]<br><br>USA       | Cross-sectional<br>descriptive study | 227 female long-term<br>breast cancer survivors                                             | Inter-individual:<br>Social support<br>(MOS Social<br>Support Survey)                                                                                                                                                                                                                                                                                                                                                                                                                                                      | Changes in dietary<br>intake were measured<br>by asking the<br>participants whether<br>their fat intake, fiber<br>intake, and fruit and<br>vegetable intake<br>increased or<br>decreased following<br>diagnosis.                                                                                                                                                             | Inter-individual:<br>NS                                                                                                                                                                                                                                                                                                                                     |          |
|                                              |                                      | Mean (SD) age 61.9 (9.9)<br>years<br><br>Mean (SD) time since<br>diagnosis 12.4 (1.8) years | Intra-individual:<br>Depressive<br>symptoms (Center<br>for Epidemiologic<br>studies –<br>Depression Scale);<br>fear of recurrence<br>(modified form of<br>the Breast Cancer<br>Anxiety and<br>Screening Behavior<br>Scale); fatigue<br>(vitality subscale of<br>the Medical<br>Outcomes Study<br>Short Form-36);<br>stressful life events<br>(11-item Life<br>Events Scale);<br>satisfaction with<br>sexual functioning<br>(Watts Sexual<br>Functioning<br>Questionnaire);<br>body satisfaction<br>(Self-Concept<br>Scale) | No baseline<br>assessment of dietary<br>intake reported.<br><br><i>Fat intake</i><br>Decreased: n=100<br>(44%)<br>Increased or no<br>change: n=127 (56%)<br><br><i>Fiber intake</i><br>Increased: n=96<br>(42%)<br>Decreased or no<br>change: n=131 (58%)<br><br><i>Fruit and vegetable<br/>intake</i><br>Increased: n=98<br>(43%)<br>Decreased or no<br>change: n=129 (57%) | Intra-individual:<br>There was a trend<br>toward less <i>fatigue</i><br>(e.g. greater vitality<br>scores) among women<br>who reported<br>increasing their fruit<br>and vegetable intake,<br>compared with women<br>who reported<br>decreasing or<br>maintaining their pre-<br>diagnosis dietary<br>patterns (p=0.08).<br><br>All other variables<br>were NS |          |
| Barbosa et al.<br>(2019)[87]<br><br>Portugal | Prospective<br>cohort study          | 428 women newly<br>diagnosed with <i>breast<br/>cancer</i> and proposed for<br>surgery      | Socio-<br>demographic:<br>Educational level,<br>age, and marital<br>status                                                                                                                                                                                                                                                                                                                                                                                                                                                 | Both pre-diagnosis<br>and post-diagnosis<br>fruits and/or<br>vegetables intake<br>was measured using<br>an interview at 3-<br>year follow-up.                                                                                                                                                                                                                                | Socio-demographic:<br>All NS                                                                                                                                                                                                                                                                                                                                |          |
|                                              |                                      | 50.7% had less than 55<br>years of age at baseline                                          | Intra-individual:<br>Anxiety and<br>depression<br>(Hospital Anxiety<br>and Depression<br>Scale) at baseline<br><br>Assessments before<br>diagnosis & 3 years<br>after diagnosis                                                                                                                                                                                                                                                                                                                                            | Participants were<br>classified according<br>to adherence to the<br>recommendation for<br>cancer prevention on<br>fruit and vegetable<br>intake<br><br>intake (at least five<br>portions of fruits<br>and/or vegetables per<br>day)<br><br>Non-adherence:                                                                                                                    | Intra-individual:<br>NS                                                                                                                                                                                                                                                                                                                                     |          |

|                              |                                                                                                       |                                                                                                    |                                                                                                                                                                                                                                                                                                                                                                                                              |                                                                                                                                                                                                                                                                                                                                                                                                                                                                                                                                                                                                                                                                                                      |                                                                                                                                                                                                                                                                                                                                                                                                                                                                                                                                                                                                                                                                                   |
|------------------------------|-------------------------------------------------------------------------------------------------------|----------------------------------------------------------------------------------------------------|--------------------------------------------------------------------------------------------------------------------------------------------------------------------------------------------------------------------------------------------------------------------------------------------------------------------------------------------------------------------------------------------------------------|------------------------------------------------------------------------------------------------------------------------------------------------------------------------------------------------------------------------------------------------------------------------------------------------------------------------------------------------------------------------------------------------------------------------------------------------------------------------------------------------------------------------------------------------------------------------------------------------------------------------------------------------------------------------------------------------------|-----------------------------------------------------------------------------------------------------------------------------------------------------------------------------------------------------------------------------------------------------------------------------------------------------------------------------------------------------------------------------------------------------------------------------------------------------------------------------------------------------------------------------------------------------------------------------------------------------------------------------------------------------------------------------------|
|                              |                                                                                                       |                                                                                                    | Pre-diagnosis 69.2%<br>3-year follow-up:<br>65.6%                                                                                                                                                                                                                                                                                                                                                            |                                                                                                                                                                                                                                                                                                                                                                                                                                                                                                                                                                                                                                                                                                      |                                                                                                                                                                                                                                                                                                                                                                                                                                                                                                                                                                                                                                                                                   |
| Bergengren et al. (2020)[89] | Cross-sectional nation-wide, population based study                                                   | 1288 low-risk <i>prostate cancer</i> survivors<br><br>Mean age 63 years at diagnosis (Range 59-66) | <i>Intra-individual:</i><br>Health related quality of life (Expanded Prostate Cancer Index Composite 26 (EPIC-26))                                                                                                                                                                                                                                                                                           | Dietary changes were assessed using a questionnaire composed of study-specific questions, by asking whether their food intake changed after receiving the diagnosis. Changes were categorized into: “I eat less healthy”, “Unchanged” or “I eat healthier”<br><br>Healthier diet: 184 (14%)<br>Unhealthier diet: 2 (0.2%)<br>Unchanged: 958 (74.4%)                                                                                                                                                                                                                                                                                                                                                  | <i>Intra-individual:</i><br>NS                                                                                                                                                                                                                                                                                                                                                                                                                                                                                                                                                                                                                                                    |
|                              |                                                                                                       |                                                                                                    | <i>Socio-demographic:</i>                                                                                                                                                                                                                                                                                                                                                                                    |                                                                                                                                                                                                                                                                                                                                                                                                                                                                                                                                                                                                                                                                                                      |                                                                                                                                                                                                                                                                                                                                                                                                                                                                                                                                                                                                                                                                                   |
| Clotas et al. (2021)[90]     | Results of the first cross-sectional study of a larger mixed cohort study (retrospective-prospective) | 2235 women diagnosed with breast cancer                                                            | <i>Socio-demographic:</i><br><br>Age:<br>< 50 years, 50–65 years, and > 65 years<br><br>Social class:<br>based on the occupation of the main provider in the household classified as: nonmanual class (the most privileged class), and manual class (the less privileged class).<br><br>Cohabitation:<br>living alone vs. cohabiting<br><br>40.1% > 65 years<br>75.5% non-manual class<br>22.68% lived alone | Dietary changes were assessed using a food frequency questionnaire. Changes were calculated by comparing eating habits before and after cancer diagnosis.<br><br>Statistically significant change in the consumption of all food groups after diagnosis ( $p < 0.05$ ). 5.5% had followed a healthy diet before diagnosis, increasing to 9.6% after diagnosis. Positive change for most food groups, especially for consumption of nuts (13.2%), fruit (9.7%), and vegetables (8.8%). However, the percentage of women living alone, compared to 19.6% of those living with one or more people. <i>Living alone</i> was also associated with a greater improvement in the consumption of vegetables. | Age:<br>Significant association between women’s age for the four food groups ( $p \leq 0.05$ ), with <i>younger</i> women (aged <50 years) showing a greater increase in healthy food types.<br><br>Social class:<br>Significant association between social class for the four food groups ( $p \leq 0.05$ ), with those in <i>nonmanual classes (high classes)</i> showing a greater increase in healthy food types.<br><br>Cohabitation:<br>Improved pattern of nut consumption in 25.1% of women living alone, compared to 19.6% of those living with one or more people. <i>Living alone</i> was also associated with a greater improvement in the consumption of vegetables. |
| Driessen et al. (2021)[83]   | Cross-sectional                                                                                       | 229 newly diagnosed cancer patients                                                                | <i>Intra-individual:</i><br>Health awareness, meaning of cancer,                                                                                                                                                                                                                                                                                                                                             | By use of self-developed questionnaires,                                                                                                                                                                                                                                                                                                                                                                                                                                                                                                                                                                                                                                                             | <i>Intra-individual:</i><br>All NS                                                                                                                                                                                                                                                                                                                                                                                                                                                                                                                                                                                                                                                |

|                                                |                 |                                                                                                                                                                                                                                                                                                                                                                                                                                                                    |                                                                                                                                                                                                                                                                                                                                                                                                                                                                 |                                                                                                                                                                                                                                                                                                                                                                                                                                                                                                                                |                                                                                                                                                                                                                                                                                                            |
|------------------------------------------------|-----------------|--------------------------------------------------------------------------------------------------------------------------------------------------------------------------------------------------------------------------------------------------------------------------------------------------------------------------------------------------------------------------------------------------------------------------------------------------------------------|-----------------------------------------------------------------------------------------------------------------------------------------------------------------------------------------------------------------------------------------------------------------------------------------------------------------------------------------------------------------------------------------------------------------------------------------------------------------|--------------------------------------------------------------------------------------------------------------------------------------------------------------------------------------------------------------------------------------------------------------------------------------------------------------------------------------------------------------------------------------------------------------------------------------------------------------------------------------------------------------------------------|------------------------------------------------------------------------------------------------------------------------------------------------------------------------------------------------------------------------------------------------------------------------------------------------------------|
| The Netherlands                                |                 | 59% <i>endometrial</i> , and 41% <i>ovarian</i> cancer<br><br>Mean (SD) age 66 (9.5) years<br><br>Median (IQR) BMI 27.7 (24.2 – 32.8) kg/m <sup>2</sup>                                                                                                                                                                                                                                                                                                            | appearance concerns, body change concerns, life interferences, and worry<br><br>All cancer-related psychosocial factors were assessed using the Impact of Cancer Scale version 2.                                                                                                                                                                                                                                                                               | participants reported if they made changes (yes/no) in diet since they were diagnosed with cancer until 18 months after initial treatment. Changes were classified as healthy (more consumption of fruit, vegetables, fibers/whole grain and less consumption of fat, meat, sugar, alcohol and salt) or unhealthy (vice versa) according to the World Cancer Research Fund recommendations.<br><br>20% reported to eat healthier.<br>80% reported not having changed their diet (N = 169) or made unhealthier changes (N = 3). |                                                                                                                                                                                                                                                                                                            |
| <i>Socio-demographic:</i><br>Educational level |                 |                                                                                                                                                                                                                                                                                                                                                                                                                                                                    |                                                                                                                                                                                                                                                                                                                                                                                                                                                                 |                                                                                                                                                                                                                                                                                                                                                                                                                                                                                                                                |                                                                                                                                                                                                                                                                                                            |
| Green et al. (2014)[76]<br><br>Australia       | Cross-sectional | 92 <i>Prostate</i> cancer (PC) survivors and 145 <i>breast</i> cancer (BC) survivors undergoing treatment or having completed treatments<br><br>BC survivors:<br>Mean (SD) age 56.8 (10.5) years<br>Median (SD) time since diagnosis 53.5 (63.11) months<br>Mean (SD) BMI 26.3 (5.4) kg/m <sup>2</sup><br><br>PC survivors:<br>Mean (SD) age 66.6 (7.7) years<br>Median (SD) time since diagnosis 30.0 (45.0) months<br>Mean (SD) BMI 26.1 (3.1) kg/m <sup>2</sup> | <i>Intra-individual:</i><br>illness representations (timeline acute/chronic, timeline cyclical, consequences, personal control, treatment control, illness coherence and emotional representations) assessed by the Illness Perception Questionnaire-Revised, self-efficacy (Exercise Self-Efficacy scale & Nutrition Self-Efficacy Scale); and exercise stage of change (measured with a scale developed by Marcus et al., 1992) and adapted version for diet. | Participants were asked to record the extent to which their diet and exercise behaviour had changed since diagnosis on a five point scale, with three representing have not changed.<br><br>Regarding diet changes since diagnosis, 59% of BC and 59% of PC participants reported eating more healthily, 6% of BC and no PC participants indicated eating less healthily, and 34% and 41%, respectively, remained unchanged.                                                                                                   | <i>Socio-demographic:</i><br>Educational level NS<br><br><i>Intra-individual:</i><br>Healthier eating since diagnosis showed significant independent associations with <i>higher personal control</i> ; <i>higher negative emotional representations</i> ; and <i>higher stage of change</i> (all p<0.05). |
| Hagen et al. (2018)[91]<br><br>Norway          | Cross-sectional | 180 postmenopausal breast cancer survivors                                                                                                                                                                                                                                                                                                                                                                                                                         | <i>Socio-demographic:</i><br>Age, marital status, years of education.                                                                                                                                                                                                                                                                                                                                                                                           | Patients were asked whether they had made any changes in their diet two years                                                                                                                                                                                                                                                                                                                                                                                                                                                  | <i>Socio-demographic:</i><br>Patients who changed their diet were significantly <i>younger</i> ,                                                                                                                                                                                                           |

|                             |                 |                                                                                                                                                                                                                                                                                                              |                                                                                                         |                                                                                                                                                                                                                                                                                                                                                                                                                                                                                      |                                                                                                                                                                                                                                                 |
|-----------------------------|-----------------|--------------------------------------------------------------------------------------------------------------------------------------------------------------------------------------------------------------------------------------------------------------------------------------------------------------|---------------------------------------------------------------------------------------------------------|--------------------------------------------------------------------------------------------------------------------------------------------------------------------------------------------------------------------------------------------------------------------------------------------------------------------------------------------------------------------------------------------------------------------------------------------------------------------------------------|-------------------------------------------------------------------------------------------------------------------------------------------------------------------------------------------------------------------------------------------------|
|                             |                 | Median age 58 years<br>(Range 37–78)                                                                                                                                                                                                                                                                         |                                                                                                         | after they were<br>diagnosed with breast<br>cancer. If the answer<br>was “yes”, they were<br>asked about the<br>major changes they<br>had made in relation<br>to food items<br>excluded or included<br>in their diet. Dietary<br>data was collected<br>using a 36 food-item<br>frequency<br>questionnaire.                                                                                                                                                                           | compared to those<br>who maintained their<br>diet.<br><br>Marital status and<br>educational level both<br>NS.                                                                                                                                   |
|                             |                 | BMI<br><25 kg/m2: 51%<br>≥25: 49%                                                                                                                                                                                                                                                                            |                                                                                                         |                                                                                                                                                                                                                                                                                                                                                                                                                                                                                      |                                                                                                                                                                                                                                                 |
|                             |                 | Marital status<br>73%married/partnered                                                                                                                                                                                                                                                                       |                                                                                                         |                                                                                                                                                                                                                                                                                                                                                                                                                                                                                      |                                                                                                                                                                                                                                                 |
|                             |                 |                                                                                                                                                                                                                                                                                                              |                                                                                                         | Forty patients (22%)<br>had changed their<br>diet two years after<br>the breast cancer<br>diagnosis, which was<br>largely similar to the<br>controls (315 female<br>blood donors).<br>17 (42%) had<br>increased intake of<br>fruit and vegetables;<br>13 (32%) water; and<br>5 (12%) fish. Food<br>items most<br>commonly avoided<br>were sugar (n=21,<br>52%), and meat<br>(n=10, 25%). Eight<br>patients (20%) had<br>reduced their alcohol<br>consumption.                        |                                                                                                                                                                                                                                                 |
| Hall et al.<br>(2019)[31]   | Cross-sectional | 258 early stage cancer<br>survivors who had<br>completed primary<br>treatment<br><br>27% breast, 21%<br>hematologic, 11%<br>gynecologic, 9%<br>gastrointestinal, 8%<br>genitourinary, 6% head<br>and neck, 6% melanoma,<br>4% thoracic and 2%<br>other<br><br>54% was 60 years or<br>older<br><br>64% female | <i>Intra-individual:</i><br>Fear of cancer<br>recurrence<br>(Assessment of<br>Survivor Concerns)        | Respondents were<br>asked how each<br>health behavior had<br>changed compared<br>with before their<br>diagnosis of cancer.<br>Responses were<br>coded as follows:<br>decreased or<br>worsened, no change,<br>or increased or<br>improved. In<br>addition, each health<br>behavior was<br>assessed by adapting<br>screening questions<br>from the 2016 NCCN<br>health behavior<br>guidelines.<br><br>36% improved diet<br>after cancer diagnosis<br>8% worsened diet<br>56% no change | <i>Intra-individual:</i><br>Fear of cancer<br>recurrence was not<br>associated with<br>changes in diet.                                                                                                                                         |
| Humpel et al.<br>(2007)[78] | Cross-sectional | 113 cancer survivors<br><br>41.6% breast, 14.9%<br>melanoma, 10.9%<br>cervical, 6.9%                                                                                                                                                                                                                         | <i>Socio-<br/>demographic:</i><br>Marital status,<br>employment status,<br>age and educational<br>level | Participants were<br>asked whether the<br>cancer diagnosis<br>influenced changes in<br>their diet (the amount<br>of fat, fiber, fruits,                                                                                                                                                                                                                                                                                                                                              | <i>Socio-demographic:</i><br>No significant<br>differences were<br>found for marital<br>status and<br>education level.<br><br>657 study<br>participants, of<br>which 113 cancer<br>survivors. Only<br>results for cancer<br>survivors reported. |

|                             |    |                                             |                                               |                                                                                                                                                                                                                                                                                                                                                                                                                                                                                                                                                                                                                                                 |                                                                                                                                                                                                                                                                                                                                                           |
|-----------------------------|----|---------------------------------------------|-----------------------------------------------|-------------------------------------------------------------------------------------------------------------------------------------------------------------------------------------------------------------------------------------------------------------------------------------------------------------------------------------------------------------------------------------------------------------------------------------------------------------------------------------------------------------------------------------------------------------------------------------------------------------------------------------------------|-----------------------------------------------------------------------------------------------------------------------------------------------------------------------------------------------------------------------------------------------------------------------------------------------------------------------------------------------------------|
|                             |    | colon/rectal, 5.9% ovarian, and 19.8% other |                                               | and vegetables, takeaway) and when these changes had occurred (within 1 month, 6 months, much later, or never).                                                                                                                                                                                                                                                                                                                                                                                                                                                                                                                                 | Age:<br>Older cancer survivors were more likely to decrease their intake off fat ( $p < 0.01$ ), amount of takeaway food ( $p < 0.05$ ), increase fiber ( $p < 0.01$ ) and fruit/vegetable intake ( $p < 0.05$ ).                                                                                                                                         |
|                             |    | 86.7% female                                |                                               | The majority made positive dietary changes after diagnosis. Most made changes within 6 months of their diagnosis. Within 1 month of diagnosis, 59.0% decreased fat, 69.1% decreased takeaway, 63.2% increased fiber, and 72.7% increased fruit/vegetables.                                                                                                                                                                                                                                                                                                                                                                                      | Employment status:<br>More employed individuals increased the intake of fiber compared to those not employed ( $p < 0.05$ ).                                                                                                                                                                                                                              |
|                             |    | 49.6% 55 years or older                     |                                               | Within 6 months of their diagnosis, 88.7% decreased fat intake, 85.5% decreased takeaway food, 89.7% increased fiber intake, 90.9% increased fruit/vegetable intake.                                                                                                                                                                                                                                                                                                                                                                                                                                                                            |                                                                                                                                                                                                                                                                                                                                                           |
|                             |    | 71.2% more than 2 years after diagnosis     |                                               |                                                                                                                                                                                                                                                                                                                                                                                                                                                                                                                                                                                                                                                 |                                                                                                                                                                                                                                                                                                                                                           |
| Kassianos et al. (2017)[92] | UK | Cross-sectional                             |                                               | <i>Socio-demographic:</i><br>Educational level                                                                                                                                                                                                                                                                                                                                                                                                                                                                                                                                                                                                  | <i>Sociodemographic:</i><br>Patients who reported changes on their diet post-diagnosis were more <i>highly educated</i> than those who did not ( $p < .01$ . This was not found for patients who reported changes post-therapy.                                                                                                                           |
|                             |    |                                             | 95 prostate cancer patients                   | <i>Intra-individual:</i><br>Perceived behavioural control (18- item Form C of the Cancer Locus of Control Scale)                                                                                                                                                                                                                                                                                                                                                                                                                                                                                                                                | <i>Intra-individual:</i><br>Patients who changed their diet after diagnosis reported significantly lower levels of <i>cognitive functioning</i> than those who did not ( $p = .02$ ).                                                                                                                                                                     |
|                             |    |                                             | Mean age 68.6 (SE 0.7)<br>Range 55 - 93 years | Health related quality of life (30-item EORTC QLQ C30 and the two functioning scales (sexual activity, sexual functioning) from the prostate cancer- specific EORTC QLQ PR25.                                                                                                                                                                                                                                                                                                                                                                                                                                                                   | They also reported significantly lower levels of <i>external locus of control</i> (doctors) than those who did not ( $p = .01$ ). Patients who changed their diet after therapy reported significantly lower levels of <i>cognitive functioning</i> than those who did not ( $p < .001$ ) and lower levels of <i>emotional functioning</i> ( $p = .02$ ). |
|                             |    |                                             | Mean years since diagnosis 4.5 (SE 0.4)       |                                                                                                                                                                                                                                                                                                                                                                                                                                                                                                                                                                                                                                                 | They also scored                                                                                                                                                                                                                                                                                                                                          |
|                             |    |                                             | 84.2% retired/ not working                    |                                                                                                                                                                                                                                                                                                                                                                                                                                                                                                                                                                                                                                                 |                                                                                                                                                                                                                                                                                                                                                           |
|                             |    |                                             | 80% married/living with another adult         |                                                                                                                                                                                                                                                                                                                                                                                                                                                                                                                                                                                                                                                 |                                                                                                                                                                                                                                                                                                                                                           |
|                             |    |                                             |                                               | Participants were asked whether they changed their diet after diagnosis and after therapy started. In order to assess whether patients made healthy or unhealthy changes, a retrospective question was used. Participants were asked to rate the consumption of seven food items (fruits, vegetables, red meat, dairy products, alcohol, sweets, fish) on a 7-point Likert scale ranging from "very much less" to "very much more" with the middle option being "the same" to assess no change. Few (0%–6.4%) participants initiated unhealthy changes either post-diagnosis or post- therapy compared to healthy changes (43.2%–59.6%) whereas |                                                                                                                                                                                                                                                                                                                                                           |

almost one in two participants reported no changes in any of the food items postdiagnosis or post-therapy (39.4%–51.5%). None of the participants increased red meat consumption post-diagnosis (0%) and only 1% post-therapy. Decrease in red meat consumption was the most frequently reported healthy dietary change (56.8%–59.6%).

significantly lower on *general QoL* ( $p = .04$ ) and had significantly lower *external locus of control* (doctors) ( $p = .04$ ).

|                            |     |                                                                  |                                                                                                                                                                     |                                                                                                                                                                                                                                                                                             |                                                                                                                                                                       |                                                                                                                                                                                    |                                                                 |                                                                                                                                                                                                           |                                           |
|----------------------------|-----|------------------------------------------------------------------|---------------------------------------------------------------------------------------------------------------------------------------------------------------------|---------------------------------------------------------------------------------------------------------------------------------------------------------------------------------------------------------------------------------------------------------------------------------------------|-----------------------------------------------------------------------------------------------------------------------------------------------------------------------|------------------------------------------------------------------------------------------------------------------------------------------------------------------------------------|-----------------------------------------------------------------|-----------------------------------------------------------------------------------------------------------------------------------------------------------------------------------------------------------|-------------------------------------------|
| Kwarteng et al. (2020)[35] | USA | Intervention study (RCT)<br><br>6-month weight loss intervention | 246 female overweight African-American breast cancer survivors who completed treatment at least 6 months before recruitment (Intervention: n= 125, Control: n= 121) | <i>Inter-individual:</i> Social support (The Social Support questionnaire)                                                                                                                                                                                                                  | Healthy Eating Index (HEI) was calculated by Nutrition Quest using the interviewer administered Block 2005 Food Frequency Questionnaire                               | <i>Inter-individual:</i> Lower friend support for eating habits-discouragement (p = 0.014) was associated with improvements in diet.                                               | Only overweight/obese survivors were included (BMI ≥ 25 kg/ m2) |                                                                                                                                                                                                           |                                           |
|                            |     |                                                                  | Mean (SD) age 57.5 (10.1) years                                                                                                                                     |                                                                                                                                                                                                                                                                                             |                                                                                                                                                                       | HEI at baseline (Range 38.9–93.9) Mean 65.1 (SD 11.1)                                                                                                                              |                                                                 | Higher self-efficacy (p < 0.001) was associated with improvements in diet.                                                                                                                                | Control condition was a Self-Guided Group |
|                            |     |                                                                  | Mean (SD) BMI 36.1 (6.2) kg/m²                                                                                                                                      |                                                                                                                                                                                                                                                                                             |                                                                                                                                                                       | 6-month HEI change: Mean 5.0 (SD 10.1)                                                                                                                                             |                                                                 | Formal mediation tests were conducted to examine whether self-efficacy and social support mediated the association between group and change in diet. No evidence to suggest a mediating effect was found. |                                           |
|                            |     |                                                                  |                                                                                                                                                                     |                                                                                                                                                                                                                                                                                             |                                                                                                                                                                       |                                                                                                                                                                                    |                                                                 |                                                                                                                                                                                                           |                                           |
| Kwarteng et al. (2021)[36] | USA | Intervention study (RCT)<br><br>6-month weight loss intervention | 246 female overweight African-American breast cancer survivors at least 6 months post-treatment                                                                     | <i>Intra-individual:</i> Contemporary life stress (Crisis in Family systems)                                                                                                                                                                                                                | Dietary changes were measured by calculating Healthy Eating Index (HEI) by NutritionQuest using the interviewer administered Block 2005 Food Frequency Questionnaire. | <i>Intra-individual:</i> Stress was not associated with dietary changes in the intervention group or control group. Stress was not associated with maintenance of dietary changes. | Only overweight/obese survivors were included (BMI ≥ 25 kg/ m2) |                                                                                                                                                                                                           |                                           |
|                            |     |                                                                  | Intervention: n=125<br>Control: n=121                                                                                                                               | Over half of the women (57%) experienced changes in their relationship, such as getting divorced or breaking up with a partner. Nearly half (46%) had something in their neighborhood happen that made them feel unsafe. Over a third (39%) experienced financial changes such as missing a | Intervention group (n=125):<br>Baseline: 65.7 ± 11.4<br>6-month change: 6.4 ± 10.0<br>12-month change: 5.0 ± 9.5                                                      |                                                                                                                                                                                    | Control condition was a Self-Guided Group                       |                                                                                                                                                                                                           |                                           |
|                            |     |                                                                  | Mean (SD) age 57.5 (10.1) years<br>Range 30.6–82.2                                                                                                                  |                                                                                                                                                                                                                                                                                             |                                                                                                                                                                       |                                                                                                                                                                                    |                                                                 |                                                                                                                                                                                                           |                                           |
|                            |     |                                                                  |                                                                                                                                                                     |                                                                                                                                                                                                                                                                                             |                                                                                                                                                                       |                                                                                                                                                                                    |                                                                 |                                                                                                                                                                                                           |                                           |

|                            |                          |                                                                                                                                           |                                                                                                                                                                                                                                                           |                                                                                                                                                                                                                                                                                                                                                                                                                                                                                                                                                                                                                                                                                                                                       |                                                                                                                                                                                                                                                                                                                                                                                                                                                                                                                                                                                                                                                                                                                                                                          |                                                                                                                                                                                                                                                                                                                                                                                                                                |  |
|----------------------------|--------------------------|-------------------------------------------------------------------------------------------------------------------------------------------|-----------------------------------------------------------------------------------------------------------------------------------------------------------------------------------------------------------------------------------------------------------|---------------------------------------------------------------------------------------------------------------------------------------------------------------------------------------------------------------------------------------------------------------------------------------------------------------------------------------------------------------------------------------------------------------------------------------------------------------------------------------------------------------------------------------------------------------------------------------------------------------------------------------------------------------------------------------------------------------------------------------|--------------------------------------------------------------------------------------------------------------------------------------------------------------------------------------------------------------------------------------------------------------------------------------------------------------------------------------------------------------------------------------------------------------------------------------------------------------------------------------------------------------------------------------------------------------------------------------------------------------------------------------------------------------------------------------------------------------------------------------------------------------------------|--------------------------------------------------------------------------------------------------------------------------------------------------------------------------------------------------------------------------------------------------------------------------------------------------------------------------------------------------------------------------------------------------------------------------------|--|
|                            |                          |                                                                                                                                           |                                                                                                                                                                                                                                                           | rent or mortgage payment or had their electricity cut off. Over a third (34%) had a family member die or become ill.                                                                                                                                                                                                                                                                                                                                                                                                                                                                                                                                                                                                                  | Baseline: 64.4 ± 10.8<br>6-month change: 3.3 ± 10.1<br>12-month change: 3.8 ± 10.8                                                                                                                                                                                                                                                                                                                                                                                                                                                                                                                                                                                                                                                                                       |                                                                                                                                                                                                                                                                                                                                                                                                                                |  |
| Maunsell et al. (2002)[70] | Intervention study (RCT) | 250 women with newly diagnosed, nonmetastatic breast cancer                                                                               | <i>Socio-demographic:</i><br>Age, education, income<br><br><i>Intra-individual:</i><br>Psychological distress at diagnosis (Psychiatric Symptom Index - PSI), stressful life events in the past 5 years (modified version of the Life Experiences Survey) | Participants were asked “During the past 12 months, have you made any changes to your diet?” to determine whether women had initiated dietary changes since diagnosis. If yes, the interviewer asked about specific changes in consumption of meat, fish, fruit and vegetables, legumes, dessert, alcohol, vitamins, dairy products, and cereals and bread. To assess the direction of changes, women were asked whether consumption had increased, decreased, or was introduced or eliminated in the period since diagnosis.<br><br>41% reported making dietary change. Meat intake was the most common change (77%), followed by fruit and vegetables (72%) and dessert (66%). A change in alcohol consumption was reported by 19%. | <i>Socio-demographic:</i><br>Women initiating dietary change were more likely to be younger. 50% of women aged less than 50 years initiated dietary change, compared with 42% and 16% among those aged 50 to 69 and ≥70 years, respectively.<br><br>Education and income NS<br><br><i>Intra-individual:</i><br>higher initial psychological distress, a greater number of stressful events in the 5 years preceding diagnosis were associated with initiating dietary change. In analyses adjusted for possible confounders, women who reported initiating dietary changes had a significantly higher mean decrease in psychological distress (average 9.0 points) in the year after diagnosis than those who did not make dietary changes (average 4.7 points; P =.03). | Data used in these analyses came from 250 women who completed all three study interviews: the first immediately after obtaining consent, and 3 and 12 months later. These women represent 89% of the consecutive series of 282 women initially eligible for a randomized trial assessing effects on quality of life in the year after breast cancer diagnosis of a monthly telephone psychological distress screening program. |  |
| Mosher et al. (2008)[47]   | Intervention study (RCT) | 543 breast and prostate cancer patients, randomly assigned to receive a 10 month program of tailored mailed print materials that aimed to | <i>Intra-individual:</i><br>For each of the goal behaviors, participants rated their self-efficacy in response to the                                                                                                                                     | Telephone surveys conducted at baseline and 1 year assessed dietary practices and self-efficacy.                                                                                                                                                                                                                                                                                                                                                                                                                                                                                                                                                                                                                                      | <i>Intra-individual:</i><br>Changes in self-efficacy for fat restriction and eating more                                                                                                                                                                                                                                                                                                                                                                                                                                                                                                                                                                                                                                                                                 | Baseline values of the mediator and dependent variables were included as covariates in all analyses; thus, the                                                                                                                                                                                                                                                                                                                 |  |

|                                      |                          |                                                                                                                                                                                                                                                                                                                                                                                 |                                                                                                                                                                                                                                                                                                                                  |                                                                                                                                                                                                                   |                                                                                                                                                                                                                                                                                                                                                                                                                                 |                                                                                                                                                                                                                                                                                                                                                                               |
|--------------------------------------|--------------------------|---------------------------------------------------------------------------------------------------------------------------------------------------------------------------------------------------------------------------------------------------------------------------------------------------------------------------------------------------------------------------------|----------------------------------------------------------------------------------------------------------------------------------------------------------------------------------------------------------------------------------------------------------------------------------------------------------------------------------|-------------------------------------------------------------------------------------------------------------------------------------------------------------------------------------------------------------------|---------------------------------------------------------------------------------------------------------------------------------------------------------------------------------------------------------------------------------------------------------------------------------------------------------------------------------------------------------------------------------------------------------------------------------|-------------------------------------------------------------------------------------------------------------------------------------------------------------------------------------------------------------------------------------------------------------------------------------------------------------------------------------------------------------------------------|
|                                      |                          | increase fruit and vegetable consumption, reduce fat intake, and/or increase exercise (intervention group, n=253) or a 10-month program of publically available materials on diet and exercise (attention control group, n=266).                                                                                                                                                | question, 'How sure are you that you could (exercise) at least 30 minutes a day at least 5 days a week; eat at least 5 servings of fruit and vegetables per day; or eat a low-fat diet?'                                                                                                                                         | Dietary outcomes: Participants completed a modified version of the Diet History Questionnaire (DHQ)                                                                                                               | fruits and vegetables were significant mediators of the intervention's effects on dietary outcomes at 1-year follow-up.                                                                                                                                                                                                                                                                                                         | effects observed represent change over the course of the intervention.                                                                                                                                                                                                                                                                                                        |
|                                      |                          | Mean age 57.0 years (SD10.8)                                                                                                                                                                                                                                                                                                                                                    | Participants responded to each question on a 5-point scale from 1 (very unsure) to 5 (very sure).                                                                                                                                                                                                                                | Mean Diet Quality Index-revised score<br>-Intervention: Baseline: 66.5(SD11.3)<br>1 year: 72.8(SD10.6)<br>-Attention control: Baseline: 66.9 (SD9.5)<br>1 year: 68.7 (SD10.9)                                     | Experimental participants endorsed greater changes in self-efficacy for fat restriction and eating more fruit and vegetables than did control participants, which, in turn, were associated with better diet quality.                                                                                                                                                                                                           |                                                                                                                                                                                                                                                                                                                                                                               |
|                                      |                          | Mean time since diagnosis 3.83 months (SD 2.74)                                                                                                                                                                                                                                                                                                                                 | Descriptions of exercise, fruit and vegetable servings, and a low-fat diet were provided prior to each question.                                                                                                                                                                                                                 | Mean total percent of calories from fat<br>-Intervention: Baseline: 38.0 (SD5.7)<br>1 year: 33.7(SD5.7)<br>-Attention control: Baseline: 37.8 (SD5.6)<br>1 year: 35.7 (SD4.6)                                     |                                                                                                                                                                                                                                                                                                                                                                                                                                 |                                                                                                                                                                                                                                                                                                                                                                               |
|                                      |                          |                                                                                                                                                                                                                                                                                                                                                                                 |                                                                                                                                                                                                                                                                                                                                  | Mean no. of daily servings of fruit and vegetables<br>-Intervention: Baseline: 5.1 (SD2.7)<br>1 year: 6.2 (SD2.8)<br>-Attention control Baseline: 5.0 (SD2.3)<br>1 year: 5.6 (SD2.6)                              |                                                                                                                                                                                                                                                                                                                                                                                                                                 |                                                                                                                                                                                                                                                                                                                                                                               |
| Moshier et al. (2013)[48]<br><br>USA | Intervention study (RCT) | Breast and prostate cancer survivors (N=489), randomly assigned to receive a 10-month program of tailored mailed print materials that aimed to increase fruit and vegetable consumption, reduce fat intake, and/or increase exercise (intervention group, n=236) or a 10-month program of publically available materials on diet and exercise (attention control group, n=253). | <i>Intra-individual:</i><br>Same as Moshier et al. (2008) for self-efficacy.<br><br>+ <i>Change in barriers</i><br>An author-constructed barriers questionnaire assessed 16 common barriers to physical activity, 12 common barriers to fruit and vegetable consumption, and nine common barriers to adhering to a low-fat diet. | See Moshier et al. (2008)<br><br>Mean Diet Quality Index-revised score<br>-Intervention: Baseline: 66.6 (SD11.1)<br>2 years: 71.5(SD10.5)<br>-Attention control: Baseline: 67.0 (SD9.4)<br>2 years: 68.9 (SD10.6) | <i>Intra-individual:</i><br>Change in self-efficacy for fat restriction partially explained the intervention's effect on fat intake.<br>Change in self-efficacy for fruit and vegetable consumption partially explained the intervention's effect on daily fruit and vegetable intake.<br>Change in self-efficacy for fat restriction partially accounted for the intervention's impact on overall diet quality among men only. | Same intervention as Moshier et al (2008); long-term outcomes 2-year follow-up. Results replicate the mediating effects of self-efficacy on fruit and vegetable intake and fat restriction found at 1-year follow-up (Moshier et al 2008) and extend these findings by suggesting that change in self-efficacy may play an important role in the durability of dietary gains. |
|                                      |                          | Mean age 57.2 years (SD=10.7)<br><br>Mean time since diagnosis 3.9 months (SD=2.8) at the time of study enrollment.                                                                                                                                                                                                                                                             | For each item, participants were asked to indicate 'yes, it was a reason for them not practicing the goal behavior' or 'no, it was not a reason for them not                                                                                                                                                                     | Mean total percent of calories from fat<br>-Intervention: Baseline: 38(SD 5.7)<br>2 years: 36.5 (SD 6.6)<br>-Attention control: Baseline: 37.8 (SD5.6)<br>2 years: 38.0 (SD5.4)                                   | Change in barriers to fat restriction from baseline to year 1 predicted the percentage of kcal from fat at year 2 when controlling for baseline levels of the                                                                                                                                                                                                                                                                   | Baseline values of the mediator and dependent variables were included as covariates in all analyses; thus, the effects observed represent change                                                                                                                                                                                                                              |



|                           |                                  |                                                                                                                                                                                     | practicing the goal behavior’.                                                                 | Mean no. of daily servings of fruit and vegetable intake<br>-Intervention: Baseline: 5.1 (SD2.7)<br>2 years: 6.0 (SD 2.7)<br>-Attention control: Baseline: 5.0 (SD2.3)<br>2 years: 5.7 (SD2.8)                                                                                                                                                                                                                                                                                                                                                                                                                                                                                                                                       | dependent variable. In the total sample, <i>change in barriers to fat restriction</i> was positively associated with the percentage of kcal from fat. Also, changes in <i>barriers to fat restriction and fruit and vegetable intake</i> were negatively associated with diet quality.                                                                                                                                                                                                                                                                                                                                                                                                                                                                                                                                                                                                                                                                                                                                                              | during the study period. |
|---------------------------|----------------------------------|-------------------------------------------------------------------------------------------------------------------------------------------------------------------------------------|------------------------------------------------------------------------------------------------|--------------------------------------------------------------------------------------------------------------------------------------------------------------------------------------------------------------------------------------------------------------------------------------------------------------------------------------------------------------------------------------------------------------------------------------------------------------------------------------------------------------------------------------------------------------------------------------------------------------------------------------------------------------------------------------------------------------------------------------|-----------------------------------------------------------------------------------------------------------------------------------------------------------------------------------------------------------------------------------------------------------------------------------------------------------------------------------------------------------------------------------------------------------------------------------------------------------------------------------------------------------------------------------------------------------------------------------------------------------------------------------------------------------------------------------------------------------------------------------------------------------------------------------------------------------------------------------------------------------------------------------------------------------------------------------------------------------------------------------------------------------------------------------------------------|--------------------------|
| Shaffer et al. (2016)[49] | Longitudinal observational study | 108 colorectal cancer patients and 162 caregivers (92 dyads)<br><br>Mean age patients 62.07 (SD 12.07)<br><br>Mean days since diagnosis at T1: 55.29 (SD 40.16)<br><br>31.5% female | <i>Intra-individual:</i> Cancer-related stress (six-item Appraisal of Cancer Experience Scale) | Participants’ consumption of fruits and vegetables was assessed by their responses to “How many days per week do you eat at least five servings of fruits and vegetables?”<br>The count of number of days per week meeting the recommended guidelines (i.e., greater than five servings of fruit and vegetables) was measured at each time point: at two months post-diagnosis (T1), six (T2), and 12 months post-diagnosis (T3)<br><br>Both patients and caregivers consumed five or more servings of fruits and vegetables approximately 3 days per week on average during the first year after the diagnosis. Fewer than 10 % of patients and caregivers reported consuming five or more servings of fruits and vegetables daily. | <i>Intra-individual:</i> Patients’ cancer-related stress was significantly positively associated with their own change pattern in fruit and vegetable consumption, which decreased from T1 to T2 and increased from T2 to T3. In other words, patients who reported greater cancer-related stress at T1 showed a greater decrease in their FVC during the first 6 months following the diagnosis when the majority of cancer treatment was underway, yet a greater increase in FVC by the end of the first year when the treatments typically ceased.<br><br>For patients, those with caregivers who reported greater stress from cancer showed a greater decrease in their fruit and vegetable consumption during the first 6 months following the diagnosis, yet a greater increase in fruit and vegetable consumption by the end of the first year.<br><br>Findings suggest that perceived stress from cancer hinders fruit and vegetable consumption around the diagnosis, but motivates positive dietary changes by the end of the first year. |                          |

|                          |                                                 |                                                                                                                                                                                                                                                 |                                                                                                                                                                                                                                                                                                                                                                                                                                                                                                                                                                                                                                                                                                                                                                                                                                                        |                                                                                                                                                                                                                          |                                                                                                                                                                                                                                                                                                                                                                                                                                                                                                                                                                                                                                                                                                                                                                                                                                                                                                                                                                                                                                                                                                                                                                                                                         |                                                                           |
|--------------------------|-------------------------------------------------|-------------------------------------------------------------------------------------------------------------------------------------------------------------------------------------------------------------------------------------------------|--------------------------------------------------------------------------------------------------------------------------------------------------------------------------------------------------------------------------------------------------------------------------------------------------------------------------------------------------------------------------------------------------------------------------------------------------------------------------------------------------------------------------------------------------------------------------------------------------------------------------------------------------------------------------------------------------------------------------------------------------------------------------------------------------------------------------------------------------------|--------------------------------------------------------------------------------------------------------------------------------------------------------------------------------------------------------------------------|-------------------------------------------------------------------------------------------------------------------------------------------------------------------------------------------------------------------------------------------------------------------------------------------------------------------------------------------------------------------------------------------------------------------------------------------------------------------------------------------------------------------------------------------------------------------------------------------------------------------------------------------------------------------------------------------------------------------------------------------------------------------------------------------------------------------------------------------------------------------------------------------------------------------------------------------------------------------------------------------------------------------------------------------------------------------------------------------------------------------------------------------------------------------------------------------------------------------------|---------------------------------------------------------------------------|
| Shi et al.<br>(2018)[50] | Intervention<br>study (RCT)                     | Hispanic/Latina breast cancer survivors (n=70) were randomized to receive either a 12-week theory- and culturally-tailored dietary change program (intervention group, n=34), or standard-of-care printed recommendations (control group, n=36) | <p><i>Intra-individual:</i><br/>A survey instrument was designed to measure theory-based potential mediators based upon Social Cognitive Theory and the stages of change construct of the Trans-Theoretical Model. Participants were asked to rate their agreement with statements addressing specific behavioral mediators, including <i>stages of change, healthy food beliefs, self-efficacy of fruit and vegetable intake, behavioral capabilities, and perceived barriers</i>, including difficulty finding fruit and vegetables in the neighborhood, difficulty eating fruit and vegetables as snack, taste and snack preferences for fruit and vegetables, and family opinions on fruit and vegetables. <i>Additional psychological variables were assessed, including survivor concerns, anxiety and depression, and locus of control.</i></p> | Fruit/vegetable intake, % calories from fat, and hypothesized psychosocial mediators were assessed by study interviewers at baseline, 6 and 12-months using three 24-hour recall assessments (2 weekdays, 1 weekend day) | <p><i>Intra-individual:</i><br/>At 6 months, mediation analysis showed no indirect effect through the hypothesized psychosocial mediators. There was a trend suggesting that improved self-efficacy mediated 40% of the total intervention effect on target fruit and vegetable intake at 6 months.</p> <p>Among the hypothesized mediators of the intervention effect, <i>improved taste/snack-preference for fruit and vegetables</i> mediated nearly a quarter of the total intervention effect at 12 months. At 12 months, the intervention was associated with an increase in 0.5 fruit and vegetable serving/day through improved taste/snack-preference for fruit and vegetables at 6 and 12 months.</p> <p>In sensitivity analyses, the mediation effect of taste/snack -preference for fruit and vegetables was primarily attributed to preference for snacking on fruit and vegetables. Further, increased taste/snack-preferences for fruit and vegetables was a significant mediator of targeted fruit intake, but not targeted vegetable intake, suggesting that the intervention effect may have had more of an effect on increasing taste and snacking preferences for fruits instead of vegetables.</p> | Inclusion criteria included average intake of <5 servings of F/V per day. |
|                          |                                                 |                                                                                                                                                                                                                                                 |                                                                                                                                                                                                                                                                                                                                                                                                                                                                                                                                                                                                                                                                                                                                                                                                                                                        |                                                                                                                                                                                                                          |                                                                                                                                                                                                                                                                                                                                                                                                                                                                                                                                                                                                                                                                                                                                                                                                                                                                                                                                                                                                                                                                                                                                                                                                                         |                                                                           |
| USA                      |                                                 | Mean age 56.6 years (SD=9.7 years)                                                                                                                                                                                                              |                                                                                                                                                                                                                                                                                                                                                                                                                                                                                                                                                                                                                                                                                                                                                                                                                                                        | Mean intake of 3.1 servings of fruit and vegetables (SD=1.9) per day. No statistically significant differences between the intervention and control groups.                                                              |                                                                                                                                                                                                                                                                                                                                                                                                                                                                                                                                                                                                                                                                                                                                                                                                                                                                                                                                                                                                                                                                                                                                                                                                                         |                                                                           |
|                          |                                                 | Mean time since diagnosis 3.4 years (SD=2.7 years)                                                                                                                                                                                              |                                                                                                                                                                                                                                                                                                                                                                                                                                                                                                                                                                                                                                                                                                                                                                                                                                                        | The intervention group compared with control group                                                                                                                                                                       |                                                                                                                                                                                                                                                                                                                                                                                                                                                                                                                                                                                                                                                                                                                                                                                                                                                                                                                                                                                                                                                                                                                                                                                                                         |                                                                           |
|                          |                                                 | Mean body mass index 30.9 kg/m2 (SD=6.0 kg/m2)                                                                                                                                                                                                  |                                                                                                                                                                                                                                                                                                                                                                                                                                                                                                                                                                                                                                                                                                                                                                                                                                                        | reported an increase in mean servings of fruit and vegetables (6-month: +2.0 vs -0.1, P<0.01; 12-month: +2.0 vs. -0.4, P<0.01), and targeted fruit and vegetable intake (+2.3 vs. -0.1; P<0.01) from baseline.           |                                                                                                                                                                                                                                                                                                                                                                                                                                                                                                                                                                                                                                                                                                                                                                                                                                                                                                                                                                                                                                                                                                                                                                                                                         |                                                                           |
| Shi et al.<br>(2020)[44] | Population-based<br>prospective<br>cohort study | 2865 newly diagnosed female <i>breast</i> cancer patients                                                                                                                                                                                       | <i>Socio-demographic:</i><br>Education, income, and age                                                                                                                                                                                                                                                                                                                                                                                                                                                                                                                                                                                                                                                                                                                                                                                                | Dietary history was collected using a 139-item modified version of the Block 2005 food frequency questionnaire                                                                                                           | <i>Fruit and vegetable intake:</i><br>In multivariable analyses, compared with the low increasers of fruit and                                                                                                                                                                                                                                                                                                                                                                                                                                                                                                                                                                                                                                                                                                                                                                                                                                                                                                                                                                                                                                                                                                          |                                                                           |
|                          |                                                 |                                                                                                                                                                                                                                                 |                                                                                                                                                                                                                                                                                                                                                                                                                                                                                                                                                                                                                                                                                                                                                                                                                                                        |                                                                                                                                                                                                                          |                                                                                                                                                                                                                                                                                                                                                                                                                                                                                                                                                                                                                                                                                                                                                                                                                                                                                                                                                                                                                                                                                                                                                                                                                         |                                                                           |
| USA                      |                                                 |                                                                                                                                                                                                                                                 |                                                                                                                                                                                                                                                                                                                                                                                                                                                                                                                                                                                                                                                                                                                                                                                                                                                        |                                                                                                                                                                                                                          |                                                                                                                                                                                                                                                                                                                                                                                                                                                                                                                                                                                                                                                                                                                                                                                                                                                                                                                                                                                                                                                                                                                                                                                                                         |                                                                           |

|  |  |                                                                                                                                                                                                                                 |  |  |    |                                                                                                                                                                         |                                                                                                                                                                                                                                                                                                                                                                                                                                                                                                                                                               |                                                                                                                                                                                                                                              |
|--|--|---------------------------------------------------------------------------------------------------------------------------------------------------------------------------------------------------------------------------------|--|--|----|-------------------------------------------------------------------------------------------------------------------------------------------------------------------------|---------------------------------------------------------------------------------------------------------------------------------------------------------------------------------------------------------------------------------------------------------------------------------------------------------------------------------------------------------------------------------------------------------------------------------------------------------------------------------------------------------------------------------------------------------------|----------------------------------------------------------------------------------------------------------------------------------------------------------------------------------------------------------------------------------------------|
|  |  | Mean age at diagnosis 61 years (range 26–94 years)                                                                                                                                                                              |  |  |    | <i>Inter-individual:</i><br>Social support (Medical Outcome Study Social Support Survey Instrument)                                                                     | Trajectory groups of daily fruit and vegetable intake (n=3), % calories from dietary fat (n=4), and alcohol intake (n=3) over 24 months were identified.                                                                                                                                                                                                                                                                                                                                                                                                      | vegetable intake, the high and medium increasers were more likely <i>higher educated</i> , have a <i>higher household income</i> , to report <i>higher dispositional optimism</i> , and perceived <i>greater social support</i> at baseline. |
|  |  | Mean time since diagnosis 1.8 months, range 0.3–7.2 months.                                                                                                                                                                     |  |  |    | <i>Intra-individual:</i><br>Depressive symptoms (Center for Epidemiological Studies Depression Scale - CES-D), and dispositional optimism (Life Orientation Test – LOT) | All 3 fruit and vegetable trajectory groups reported slightly increased fruit and vegetable intake post-diagnosis (mean increase = 0.2–0.5 serving/day), while 2 groups (48% of participants) persistently consumed < 4 servings/day. Dietary fat intake did not change post-diagnosis, with 45% of survivors maintaining a high-fat diet (> 40% of calories from fat). While most survivors consumed < 1 drink/day of alcohol at all times, 21% of survivors had 1.4–3.0 drinks/day at baseline and temporarily decreased to 0.1–0.5 drinks/day at 6 months. | <i>Dietary fat intake:</i><br>All NS<br><br><i>Alcohol intake:</i><br>Temporary decrease of alcohol intake after diagnosis were more likely to have a <i>higher education</i> and a <i>higher household income</i> .                         |
|  |  | Pathways Study participants who completed ≥ 2 food frequency questionnaires at the time of breast cancer diagnosis (baseline), and at 6 and 24 months after baseline.                                                           |  |  |    |                                                                                                                                                                         |                                                                                                                                                                                                                                                                                                                                                                                                                                                                                                                                                               |                                                                                                                                                                                                                                              |
|  |  | In-person baseline interview to collect demographic, lifestyle behaviors, psychosocial, and anthropometric information. Follow-up data were collected via mailed questionnaires with interviewer assistance at 6 and 24 months. |  |  |    |                                                                                                                                                                         |                                                                                                                                                                                                                                                                                                                                                                                                                                                                                                                                                               |                                                                                                                                                                                                                                              |
|  |  |                                                                                                                                                                                                                                 |  |  |    |                                                                                                                                                                         |                                                                                                                                                                                                                                                                                                                                                                                                                                                                                                                                                               |                                                                                                                                                                                                                                              |
|  |  |                                                                                                                                                                                                                                 |  |  |    |                                                                                                                                                                         |                                                                                                                                                                                                                                                                                                                                                                                                                                                                                                                                                               |                                                                                                                                                                                                                                              |
|  |  |                                                                                                                                                                                                                                 |  |  |    |                                                                                                                                                                         |                                                                                                                                                                                                                                                                                                                                                                                                                                                                                                                                                               |                                                                                                                                                                                                                                              |
|  |  |                                                                                                                                                                                                                                 |  |  |    |                                                                                                                                                                         |                                                                                                                                                                                                                                                                                                                                                                                                                                                                                                                                                               |                                                                                                                                                                                                                                              |
|  |  |                                                                                                                                                                                                                                 |  |  |    |                                                                                                                                                                         |                                                                                                                                                                                                                                                                                                                                                                                                                                                                                                                                                               |                                                                                                                                                                                                                                              |
|  |  |                                                                                                                                                                                                                                 |  |  |    |                                                                                                                                                                         |                                                                                                                                                                                                                                                                                                                                                                                                                                                                                                                                                               |                                                                                                                                                                                                                                              |
|  |  |                                                                                                                                                                                                                                 |  |  |    |                                                                                                                                                                         |                                                                                                                                                                                                                                                                                                                                                                                                                                                                                                                                                               |                                                                                                                                                                                                                                              |
|  |  |                                                                                                                                                                                                                                 |  |  |    |                                                                                                                                                                         |                                                                                                                                                                                                                                                                                                                                                                                                                                                                                                                                                               |                                                                                                                                                                                                                                              |
|  |  |                                                                                                                                                                                                                                 |  |  |    |                                                                                                                                                                         |                                                                                                                                                                                                                                                                                                                                                                                                                                                                                                                                                               |                                                                                                                                                                                                                                              |
|  |  |                                                                                                                                                                                                                                 |  |  |    |                                                                                                                                                                         |                                                                                                                                                                                                                                                                                                                                                                                                                                                                                                                                                               |                                                                                                                                                                                                                                              |
|  |  |                                                                                                                                                                                                                                 |  |  |    |                                                                                                                                                                         |                                                                                                                                                                                                                                                                                                                                                                                                                                                                                                                                                               |                                                                                                                                                                                                                                              |
|  |  |                                                                                                                                                                                                                                 |  |  |    |                                                                                                                                                                         |                                                                                                                                                                                                                                                                                                                                                                                                                                                                                                                                                               |                                                                                                                                                                                                                                              |
|  |  |                                                                                                                                                                                                                                 |  |  |    |                                                                                                                                                                         |                                                                                                                                                                                                                                                                                                                                                                                                                                                                                                                                                               |                                                                                                                                                                                                                                              |
|  |  |                                                                                                                                                                                                                                 |  |  |    |                                                                                                                                                                         |                                                                                                                                                                                                                                                                                                                                                                                                                                                                                                                                                               |                                                                                                                                                                                                                                              |
|  |  |                                                                                                                                                                                                                                 |  |  |    |                                                                                                                                                                         |                                                                                                                                                                                                                                                                                                                                                                                                                                                                                                                                                               |                                                                                                                                                                                                                                              |
|  |  |                                                                                                                                                                                                                                 |  |  |    |                                                                                                                                                                         |                                                                                                                                                                                                                                                                                                                                                                                                                                                                                                                                                               |                                                                                                                                                                                                                                              |
|  |  |                                                                                                                                                                                                                                 |  |  |    |                                                                                                                                                                         |                                                                                                                                                                                                                                                                                                                                                                                                                                                                                                                                                               |                                                                                                                                                                                                                                              |
|  |  |                                                                                                                                                                                                                                 |  |  |    |                                                                                                                                                                         |                                                                                                                                                                                                                                                                                                                                                                                                                                                                                                                                                               |                                                                                                                                                                                                                                              |
|  |  |                                                                                                                                                                                                                                 |  |  |    |                                                                                                                                                                         |                                                                                                                                                                                                                                                                                                                                                                                                                                                                                                                                                               |                                                                                                                                                                                                                                              |
|  |  |                                                                                                                                                                                                                                 |  |  |    |                                                                                                                                                                         |                                                                                                                                                                                                                                                                                                                                                                                                                                                                                                                                                               |                                                                                                                                                                                                                                              |
|  |  |                                                                                                                                                                                                                                 |  |  |    |                                                                                                                                                                         |                                                                                                                                                                                                                                                                                                                                                                                                                                                                                                                                                               |                                                                                                                                                                                                                                              |
|  |  |                                                                                                                                                                                                                                 |  |  |    |                                                                                                                                                                         |                                                                                                                                                                                                                                                                                                                                                                                                                                                                                                                                                               |                                                                                                                                                                                                                                              |
|  |  |                                                                                                                                                                                                                                 |  |  |    |                                                                                                                                                                         |                                                                                                                                                                                                                                                                                                                                                                                                                                                                                                                                                               |                                                                                                                                                                                                                                              |
|  |  |                                                                                                                                                                                                                                 |  |  |    |                                                                                                                                                                         |                                                                                                                                                                                                                                                                                                                                                                                                                                                                                                                                                               |                                                                                                                                                                                                                                              |
|  |  |                                                                                                                                                                                                                                 |  |  |    |                                                                                                                                                                         |                                                                                                                                                                                                                                                                                                                                                                                                                                                                                                                                                               |                                                                                                                                                                                                                                              |
|  |  |                                                                                                                                                                                                                                 |  |  |    |                                                                                                                                                                         |                                                                                                                                                                                                                                                                                                                                                                                                                                                                                                                                                               |                                                                                                                                                                                                                                              |
|  |  |                                                                                                                                                                                                                                 |  |  |    |                                                                                                                                                                         |                                                                                                                                                                                                                                                                                                                                                                                                                                                                                                                                                               |                                                                                                                                                                                                                                              |
|  |  |                                                                                                                                                                                                                                 |  |  |    |                                                                                                                                                                         |                                                                                                                                                                                                                                                                                                                                                                                                                                                                                                                                                               |                                                                                                                                                                                                                                              |
|  |  |                                                                                                                                                                                                                                 |  |  |    |                                                                                                                                                                         |                                                                                                                                                                                                                                                                                                                                                                                                                                                                                                                                                               |                                                                                                                                                                                                                                              |
|  |  |                                                                                                                                                                                                                                 |  |  |    |                                                                                                                                                                         |                                                                                                                                                                                                                                                                                                                                                                                                                                                                                                                                                               |                                                                                                                                                                                                                                              |
|  |  |                                                                                                                                                                                                                                 |  |  |    |                                                                                                                                                                         |                                                                                                                                                                                                                                                                                                                                                                                                                                                                                                                                                               |                                                                                                                                                                                                                                              |
|  |  |                                                                                                                                                                                                                                 |  |  |    |                                                                                                                                                                         |                                                                                                                                                                                                                                                                                                                                                                                                                                                                                                                                                               |                                                                                                                                                                                                                                              |
|  |  |                                                                                                                                                                                                                                 |  |  |    |                                                                                                                                                                         |                                                                                                                                                                                                                                                                                                                                                                                                                                                                                                                                                               |                                                                                                                                                                                                                                              |
|  |  |                                                                                                                                                                                                                                 |  |  |    |                                                                                                                                                                         |                                                                                                                                                                                                                                                                                                                                                                                                                                                                                                                                                               |                                                                                                                                                                                                                                              |
|  |  |                                                                                                                                                                                                                                 |  |  |    |                                                                                                                                                                         |                                                                                                                                                                                                                                                                                                                                                                                                                                                                                                                                                               |                                                                                                                                                                                                                                              |
|  |  |                                                                                                                                                                                                                                 |  |  |    |                                                                                                                                                                         |                                                                                                                                                                                                                                                                                                                                                                                                                                                                                                                                                               |                                                                                                                                                                                                                                              |
|  |  |                                                                                                                                                                                                                                 |  |  |    |                                                                                                                                                                         |                                                                                                                                                                                                                                                                                                                                                                                                                                                                                                                                                               |                                                                                                                                                                                                                                              |
|  |  |                                                                                                                                                                                                                                 |  |  |    |                                                                                                                                                                         |                                                                                                                                                                                                                                                                                                                                                                                                                                                                                                                                                               |                                                                                                                                                                                                                                              |
|  |  |                                                                                                                                                                                                                                 |  |  |    |                                                                                                                                                                         |                                                                                                                                                                                                                                                                                                                                                                                                                                                                                                                                                               |                                                                                                                                                                                                                                              |
|  |  |                                                                                                                                                                                                                                 |  |  |    |                                                                                                                                                                         |                                                                                                                                                                                                                                                                                                                                                                                                                                                                                                                                                               |                                                                                                                                                                                                                                              |
|  |  |                                                                                                                                                                                                                                 |  |  |    |                                                                                                                                                                         |                                                                                                                                                                                                                                                                                                                                                                                                                                                                                                                                                               |                                                                                                                                                                                                                                              |
|  |  |                                                                                                                                                                                                                                 |  |  |    |                                                                                                                                                                         |                                                                                                                                                                                                                                                                                                                                                                                                                                                                                                                                                               |                                                                                                                                                                                                                                              |
|  |  |                                                                                                                                                                                                                                 |  |  |    |                                                                                                                                                                         |                                                                                                                                                                                                                                                                                                                                                                                                                                                                                                                                                               |                                                                                                                                                                                                                                              |
|  |  |                                                                                                                                                                                                                                 |  |  |    |                                                                                                                                                                         |                                                                                                                                                                                                                                                                                                                                                                                                                                                                                                                                                               |                                                                                                                                                                                                                                              |
|  |  |                                                                                                                                                                                                                                 |  |  |    |                                                                                                                                                                         |                                                                                                                                                                                                                                                                                                                                                                                                                                                                                                                                                               |                                                                                                                                                                                                                                              |
|  |  |                                                                                                                                                                                                                                 |  |  |    |                                                                                                                                                                         |                                                                                                                                                                                                                                                                                                                                                                                                                                                                                                                                                               |                                                                                                                                                                                                                                              |
|  |  |                                                                                                                                                                                                                                 |  |  |    |                                                                                                                                                                         |                                                                                                                                                                                                                                                                                                                                                                                                                                                                                                                                                               |                                                                                                                                                                                                                                              |
|  |  |                                                                                                                                                                                                                                 |  |  |    |                                                                                                                                                                         |                                                                                                                                                                                                                                                                                                                                                                                                                                                                                                                                                               |                                                                                                                                                                                                                                              |
|  |  |                                                                                                                                                                                                                                 |  |  |    |                                                                                                                                                                         |                                                                                                                                                                                                                                                                                                                                                                                                                                                                                                                                                               |                                                                                                                                                                                                                                              |
|  |  |                                                                                                                                                                                                                                 |  |  |    |                                                                                                                                                                         |                                                                                                                                                                                                                                                                                                                                                                                                                                                                                                                                                               |                                                                                                                                                                                                                                              |
|  |  |                                                                                                                                                                                                                                 |  |  |    |                                                                                                                                                                         |                                                                                                                                                                                                                                                                                                                                                                                                                                                                                                                                                               |                                                                                                                                                                                                                                              |
|  |  |                                                                                                                                                                                                                                 |  |  |    |                                                                                                                                                                         |                                                                                                                                                                                                                                                                                                                                                                                                                                                                                                                                                               |                                                                                                                                                                                                                                              |
|  |  |                                                                                                                                                                                                                                 |  |  |    |                                                                                                                                                                         |                                                                                                                                                                                                                                                                                                                                                                                                                                                                                                                                                               |                                                                                                                                                                                                                                              |
|  |  |                                                                                                                                                                                                                                 |  |  |    |                                                                                                                                                                         |                                                                                                                                                                                                                                                                                                                                                                                                                                                                                                                                                               |                                                                                                                                                                                                                                              |
|  |  |                                                                                                                                                                                                                                 |  |  |    |                                                                                                                                                                         |                                                                                                                                                                                                                                                                                                                                                                                                                                                                                                                                                               |                                                                                                                                                                                                                                              |
|  |  |                                                                                                                                                                                                                                 |  |  |    |                                                                                                                                                                         |                                                                                                                                                                                                                                                                                                                                                                                                                                                                                                                                                               |                                                                                                                                                                                                                                              |
|  |  |                                                                                                                                                                                                                                 |  |  |    |                                                                                                                                                                         |                                                                                                                                                                                                                                                                                                                                                                                                                                                                                                                                                               |                                                                                                                                                                                                                                              |
|  |  |                                                                                                                                                                                                                                 |  |  |    |                                                                                                                                                                         |                                                                                                                                                                                                                                                                                                                                                                                                                                                                                                                                                               |                                                                                                                                                                                                                                              |
|  |  |                                                                                                                                                                                                                                 |  |  |    |                                                                                                                                                                         |                                                                                                                                                                                                                                                                                                                                                                                                                                                                                                                                                               |                                                                                                                                                                                                                                              |
|  |  |                                                                                                                                                                                                                                 |  |  |    |                                                                                                                                                                         |                                                                                                                                                                                                                                                                                                                                                                                                                                                                                                                                                               |                                                                                                                                                                                                                                              |
|  |  |                                                                                                                                                                                                                                 |  |  |    |                                                                                                                                                                         |                                                                                                                                                                                                                                                                                                                                                                                                                                                                                                                                                               |                                                                                                                                                                                                                                              |
|  |  |                                                                                                                                                                                                                                 |  |  |    |                                                                                                                                                                         |                                                                                                                                                                                                                                                                                                                                                                                                                                                                                                                                                               |                                                                                                                                                                                                                                              |
|  |  |                                                                                                                                                                                                                                 |  |  |    |                                                                                                                                                                         |                                                                                                                                                                                                                                                                                                                                                                                                                                                                                                                                                               |                                                                                                                                                                                                                                              |
|  |  |                                                                                                                                                                                                                                 |  |  |    |                                                                                                                                                                         |                                                                                                                                                                                                                                                                                                                                                                                                                                                                                                                                                               |                                                                                                                                                                                                                                              |
|  |  |                                                                                                                                                                                                                                 |  |  |    |                                                                                                                                                                         |                                                                                                                                                                                                                                                                                                                                                                                                                                                                                                                                                               |                                                                                                                                                                                                                                              |
|  |  |                                                                                                                                                                                                                                 |  |  |    |                                                                                                                                                                         |                                                                                                                                                                                                                                                                                                                                                                                                                                                                                                                                                               |                                                                                                                                                                                                                                              |
|  |  |                                                                                                                                                                                                                                 |  |  |    |                                                                                                                                                                         |                                                                                                                                                                                                                                                                                                                                                                                                                                                                                                                                                               |                                                                                                                                                                                                                                              |
|  |  |                                                                                                                                                                                                                                 |  |  |    |                                                                                                                                                                         |                                                                                                                                                                                                                                                                                                                                                                                                                                                                                                                                                               |                                                                                                                                                                                                                                              |
|  |  |                                                                                                                                                                                                                                 |  |  |    |                                                                                                                                                                         |                                                                                                                                                                                                                                                                                                                                                                                                                                                                                                                                                               |                                                                                                                                                                                                                                              |
|  |  |                                                                                                                                                                                                                                 |  |  |    |                                                                                                                                                                         |                                                                                                                                                                                                                                                                                                                                                                                                                                                                                                                                                               |                                                                                                                                                                                                                                              |
|  |  |                                                                                                                                                                                                                                 |  |  |    |                                                                                                                                                                         |                                                                                                                                                                                                                                                                                                                                                                                                                                                                                                                                                               |                                                                                                                                                                                                                                              |
|  |  |                                                                                                                                                                                                                                 |  |  |    |                                                                                                                                                                         |                                                                                                                                                                                                                                                                                                                                                                                                                                                                                                                                                               |                                                                                                                                                                                                                                              |
|  |  |                                                                                                                                                                                                                                 |  |  |    |                                                                                                                                                                         |                                                                                                                                                                                                                                                                                                                                                                                                                                                                                                                                                               |                                                                                                                                                                                                                                              |
|  |  |                                                                                                                                                                                                                                 |  |  |    |                                                                                                                                                                         |                                                                                                                                                                                                                                                                                                                                                                                                                                                                                                                                                               |                                                                                                                                                                                                                                              |
|  |  |                                                                                                                                                                                                                                 |  |  |    |                                                                                                                                                                         |                                                                                                                                                                                                                                                                                                                                                                                                                                                                                                                                                               |                                                                                                                                                                                                                                              |
|  |  |                                                                                                                                                                                                                                 |  |  |    |                                                                                                                                                                         |                                                                                                                                                                                                                                                                                                                                                                                                                                                                                                                                                               |                                                                                                                                                                                                                                              |
|  |  |                                                                                                                                                                                                                                 |  |  |    |                                                                                                                                                                         |                                                                                                                                                                                                                                                                                                                                                                                                                                                                                                                                                               |                                                                                                                                                                                                                                              |
|  |  |                                                                                                                                                                                                                                 |  |  |    |                                                                                                                                                                         |                                                                                                                                                                                                                                                                                                                                                                                                                                                                                                                                                               |                                                                                                                                                                                                                                              |
|  |  |                                                                                                                                                                                                                                 |  |  |    |                                                                                                                                                                         |                                                                                                                                                                                                                                                                                                                                                                                                                                                                                                                                                               |                                                                                                                                                                                                                                              |
|  |  |                                                                                                                                                                                                                                 |  |  |    |                                                                                                                                                                         |                                                                                                                                                                                                                                                                                                                                                                                                                                                                                                                                                               |                                                                                                                                                                                                                                              |
|  |  |                                                                                                                                                                                                                                 |  |  |    |                                                                                                                                                                         |                                                                                                                                                                                                                                                                                                                                                                                                                                                                                                                                                               |                                                                                                                                                                                                                                              |
|  |  |                                                                                                                                                                                                                                 |  |  |    |                                                                                                                                                                         |                                                                                                                                                                                                                                                                                                                                                                                                                                                                                                                                                               |                                                                                                                                                                                                                                              |
|  |  |                                                                                                                                                                                                                                 |  |  |    |                                                                                                                                                                         |                                                                                                                                                                                                                                                                                                                                                                                                                                                                                                                                                               |                                                                                                                                                                                                                                              |
|  |  |                                                                                                                                                                                                                                 |  |  |    |                                                                                                                                                                         |                                                                                                                                                                                                                                                                                                                                                                                                                                                                                                                                                               |                                                                                                                                                                                                                                              |
|  |  |                                                                                                                                                                                                                                 |  |  |    |                                                                                                                                                                         |                                                                                                                                                                                                                                                                                                                                                                                                                                                                                                                                                               |                                                                                                                                                                                                                                              |
|  |  |                                                                                                                                                                                                                                 |  |  |    |                                                                                                                                                                         |                                                                                                                                                                                                                                                                                                                                                                                                                                                                                                                                                               |                                                                                                                                                                                                                                              |
|  |  |                                                                                                                                                                                                                                 |  |  |    |                                                                                                                                                                         |                                                                                                                                                                                                                                                                                                                                                                                                                                                                                                                                                               |                                                                                                                                                                                                                                              |
|  |  |                                                                                                                                                                                                                                 |  |  |    |                                                                                                                                                                         |                                                                                                                                                                                                                                                                                                                                                                                                                                                                                                                                                               |                                                                                                                                                                                                                                              |
|  |  |                                                                                                                                                                                                                                 |  |  |    |                                                                                                                                                                         |                                                                                                                                                                                                                                                                                                                                                                                                                                                                                                                                                               |                                                                                                                                                                                                                                              |
|  |  |                                                                                                                                                                                                                                 |  |  |    |                                                                                                                                                                         |                                                                                                                                                                                                                                                                                                                                                                                                                                                                                                                                                               |                                                                                                                                                                                                                                              |
|  |  |                                                                                                                                                                                                                                 |  |  |    |                                                                                                                                                                         |                                                                                                                                                                                                                                                                                                                                                                                                                                                                                                                                                               |                                                                                                                                                                                                                                              |
|  |  |                                                                                                                                                                                                                                 |  |  |    |                                                                                                                                                                         |                                                                                                                                                                                                                                                                                                                                                                                                                                                                                                                                                               |                                                                                                                                                                                                                                              |
|  |  |                                                                                                                                                                                                                                 |  |  |    |                                                                                                                                                                         |                                                                                                                                                                                                                                                                                                                                                                                                                                                                                                                                                               |                                                                                                                                                                                                                                              |
|  |  |                                                                                                                                                                                                                                 |  |  |    |                                                                                                                                                                         |                                                                                                                                                                                                                                                                                                                                                                                                                                                                                                                                                               |                                                                                                                                                                                                                                              |
|  |  |                                                                                                                                                                                                                                 |  |  |    |                                                                                                                                                                         |                                                                                                                                                                                                                                                                                                                                                                                                                                                                                                                                                               |                                                                                                                                                                                                                                              |
|  |  |                                                                                                                                                                                                                                 |  |  |    |                                                                                                                                                                         |                                                                                                                                                                                                                                                                                                                                                                                                                                                                                                                                                               |                                                                                                                                                                                                                                              |
|  |  |                                                                                                                                                                                                                                 |  |  |    |                                                                                                                                                                         |                                                                                                                                                                                                                                                                                                                                                                                                                                                                                                                                                               |                                                                                                                                                                                                                                              |
|  |  |                                                                                                                                                                                                                                 |  |  |    |                                                                                                                                                                         |                                                                                                                                                                                                                                                                                                                                                                                                                                                                                                                                                               |                                                                                                                                                                                                                                              |
|  |  |                                                                                                                                                                                                                                 |  |  |    |                                                                                                                                                                         |                                                                                                                                                                                                                                                                                                                                                                                                                                                                                                                                                               |                                                                                                                                                                                                                                              |
|  |  |                                                                                                                                                                                                                                 |  |  |    |                                                                                                                                                                         |                                                                                                                                                                                                                                                                                                                                                                                                                                                                                                                                                               |                                                                                                                                                                                                                                              |
|  |  |                                                                                                                                                                                                                                 |  |  |    |                                                                                                                                                                         |                                                                                                                                                                                                                                                                                                                                                                                                                                                                                                                                                               |                                                                                                                                                                                                                                              |
|  |  |                                                                                                                                                                                                                                 |  |  |    |                                                                                                                                                                         |                                                                                                                                                                                                                                                                                                                                                                                                                                                                                                                                                               |                                                                                                                                                                                                                                              |
|  |  |                                                                                                                                                                                                                                 |  |  |    |                                                                                                                                                                         |                                                                                                                                                                                                                                                                                                                                                                                                                                                                                                                                                               |                                                                                                                                                                                                                                              |
|  |  |                                                                                                                                                                                                                                 |  |  |    |                                                                                                                                                                         |                                                                                                                                                                                                                                                                                                                                                                                                                                                                                                                                                               |                                                                                                                                                                                                                                              |
|  |  |                                                                                                                                                                                                                                 |  |  |    |                                                                                                                                                                         |                                                                                                                                                                                                                                                                                                                                                                                                                                                                                                                                                               |                                                                                                                                                                                                                                              |
|  |  |                                                                                                                                                                                                                                 |  |  |    |                                                                                                                                                                         |                                                                                                                                                                                                                                                                                                                                                                                                                                                                                                                                                               |                                                                                                                                                                                                                                              |
|  |  |                                                                                                                                                                                                                                 |  |  |    |                                                                                                                                                                         |                                                                                                                                                                                                                                                                                                                                                                                                                                                                                                                                                               |                                                                                                                                                                                                                                              |
|  |  |                                                                                                                                                                                                                                 |  |  |    |                                                                                                                                                                         |                                                                                                                                                                                                                                                                                                                                                                                                                                                                                                                                                               |                                                                                                                                                                                                                                              |
|  |  |                                                                                                                                                                                                                                 |  |  |    |                                                                                                                                                                         |                                                                                                                                                                                                                                                                                                                                                                                                                                                                                                                                                               |                                                                                                                                                                                                                                              |
|  |  |                                                                                                                                                                                                                                 |  |  |    |                                                                                                                                                                         |                                                                                                                                                                                                                                                                                                                                                                                                                                                                                                                                                               |                                                                                                                                                                                                                                              |
|  |  |                                                                                                                                                                                                                                 |  |  |    |                                                                                                                                                                         |                                                                                                                                                                                                                                                                                                                                                                                                                                                                                                                                                               |                                                                                                                                                                                                                                              |
|  |  |                                                                                                                                                                                                                                 |  |  |    |                                                                                                                                                                         |                                                                                                                                                                                                                                                                                                                                                                                                                                                                                                                                                               |                                                                                                                                                                                                                                              |
|  |  |                                                                                                                                                                                                                                 |  |  |    |                                                                                                                                                                         |                                                                                                                                                                                                                                                                                                                                                                                                                                                                                                                                                               |                                                                                                                                                                                                                                              |
|  |  |                                                                                                                                                                                                                                 |  |  |    |                                                                                                                                                                         |                                                                                                                                                                                                                                                                                                                                                                                                                                                                                                                                                               |                                                                                                                                                                                                                                              |
|  |  |                                                                                                                                                                                                                                 |  |  |    |                                                                                                                                                                         |                                                                                                                                                                                                                                                                                                                                                                                                                                                                                                                                                               |                                                                                                                                                                                                                                              |
|  |  |                                                                                                                                                                                                                                 |  |  |    |                                                                                                                                                                         |                                                                                                                                                                                                                                                                                                                                                                                                                                                                                                                                                               |                                                                                                                                                                                                                                              |
|  |  |                                                                                                                                                                                                                                 |  |  |    |                                                                                                                                                                         |                                                                                                                                                                                                                                                                                                                                                                                                                                                                                                                                                               |                                                                                                                                                                                                                                              |
|  |  |                                                                                                                                                                                                                                 |  |  |    |                                                                                                                                                                         |                                                                                                                                                                                                                                                                                                                                                                                                                                                                                                                                                               |                                                                                                                                                                                                                                              |
|  |  |                                                                                                                                                                                                                                 |  |  |    |                                                                                                                                                                         |                                                                                                                                                                                                                                                                                                                                                                                                                                                                                                                                                               |                                                                                                                                                                                                                                              |
|  |  |                                                                                                                                                                                                                                 |  |  |    |                                                                                                                                                                         |                                                                                                                                                                                                                                                                                                                                                                                                                                                                                                                                                               |                                                                                                                                                                                                                                              |
|  |  |                                                                                                                                                                                                                                 |  |  |    |                                                                                                                                                                         |                                                                                                                                                                                                                                                                                                                                                                                                                                                                                                                                                               |                                                                                                                                                                                                                                              |
|  |  |                                                                                                                                                                                                                                 |  |  | </ |                                                                                                                                                                         |                                                                                                                                                                                                                                                                                                                                                                                                                                                                                                                                                               |                                                                                                                                                                                                                                              |

vegetables, meat, and snacks.  
One-year changes were obtained by subtracting values at baseline from those from the second interview.

Mean baseline dietary intake (servings per day):  
Bread (s/d) 1.5 (SD 0.6)  
Diary (s/d) 3.0 (SD 1.5)  
Fruit (s/d) 3.0 (SD1.7)  
Meat (s/d) 0.7 (SD1.4)  
Mean occasions per week:  
Snacks 4.3 (3.9)  
Fruit 10.5 (5.8)  
Vegetable 8.3 (3.2)

Change over time:  
Bread 0.0 (0.6) NS  
Dairy products -0.3 (1.4)\*  
Fruit (s/d) 0.4 (1.8)\*  
Fruit 0.9 (5.8)\*  
Vegetable 0.7 (3.5)\*  
Meat -0.1 (0.5)\*  
Snacks 0.2 (4.2) NS  
\*p<0.05

|                        |                          |                                                                                      |                                                                                                                                                                                                                        |                                                                                                                                                                                                                                                                                                                                              |                                                                                                                                                                                                                                                                                                                                                                                    |                                                                            |
|------------------------|--------------------------|--------------------------------------------------------------------------------------|------------------------------------------------------------------------------------------------------------------------------------------------------------------------------------------------------------------------|----------------------------------------------------------------------------------------------------------------------------------------------------------------------------------------------------------------------------------------------------------------------------------------------------------------------------------------------|------------------------------------------------------------------------------------------------------------------------------------------------------------------------------------------------------------------------------------------------------------------------------------------------------------------------------------------------------------------------------------|----------------------------------------------------------------------------|
| Wang et al. (2015)[51] | Intervention study (RCT) | Breast cancer survivors (N= 2817)                                                    | <i>Intra-individual:</i> Depressive symptoms (six-item short form of the Center for Epidemiologic Studies Depression Scale - CES-D)                                                                                    | 24 h dietary recalls and clinic measurement visits at baseline, 1 year, and 4 years.                                                                                                                                                                                                                                                         | <i>Intra-individual:</i> Among those with better <i>vegetable/fruit intake</i> and higher baseline <i>fiber consumption</i> at baseline, baseline depressive symptoms were not associated with either 1- or 4 year change.                                                                                                                                                         | Secondary analyses from the Women's Healthy Eating and Living (WHEL) Study |
|                        |                          |                                                                                      | Intervention group: n=1398<br>Comparison group: n=1419                                                                                                                                                                 | Plasma carotenoid concentration (known biomarkers of fruit and vegetable intake) (μmol/L)<br>Mean (SE)<br>Baseline:<br>Intervention 2.3 (0.04)<br>Comparison 2.3 (0.04)<br>Year 4:<br>Intervention 3.2 (0.07)<br>Comparison 2.2 (0.04)*<br>Fiber, mean g/day (SE)<br>Baseline:<br>Intervention 21.1(0.2)<br>Comparison 21.2 (0.2)<br>Year 4: | Among those who consumed less <i>fat</i> at baseline, depressive symptoms were not associated with decreases achieved in the first year; however, it was associated with the increase observed between years 1 and 4 (+37.9 vs. +27.3%, p=0.04).<br><br>A different pattern was observed in those who were further from the study's targeted dietary pattern at baseline. Baseline |                                                                            |
| USA                    |                          | Age<br>≥50 years 64 %<br><br>BMI<br>42 % normal weight 31 % overweight<br>27 % obese | The prevalence of depressive symptoms declined in the intervention group in the first year by -3.7 % (p=0.03) but reverted to baseline levels in year 4 (p=0.56). No such change was observed in the comparison group. |                                                                                                                                                                                                                                                                                                                                              |                                                                                                                                                                                                                                                                                                                                                                                    |                                                                            |

Intervention 25.2 (0.3)  
 Comparison 19.3 (0.2)\*  
 Percent energy from fat, mean (SE)  
 Baseline: Intervention 28.4(0.2)  
 Comparison 28.7(0.2)  
 Year 4: Intervention 27.2 (0.2)  
 Comparison 31.4 (0.2)  
 \*All p<0.0001 intervention vs comparison 4 year vs. baseline

depressive symptoms did make a difference in the amount of change achieved in the first year, but not between years 1 and 4. For those with *low baseline vegetable intake*, the first-year increase in plasma carotenoid concentration was lower for those with baseline depressive symptoms than that for those without (37.2 vs. 69.7%, p=0.02). In the first year, baseline depressive symptoms were associated with smaller increases in *fiber consumption* (+49vs. +61.2%, p<0.01) and smaller decreases in *energy consumed from fat* (-22.4 vs. -26.7, p=0.02).

|                                        |                                                            |                                                                                                                                                   |                                                                                                                                                     |                                                                                                                                                                                          |                                                                                                                                                                                                                                                                                                                                                                                                                                                                                                                   |                                                                                                                                                                                                                        |
|----------------------------------------|------------------------------------------------------------|---------------------------------------------------------------------------------------------------------------------------------------------------|-----------------------------------------------------------------------------------------------------------------------------------------------------|------------------------------------------------------------------------------------------------------------------------------------------------------------------------------------------|-------------------------------------------------------------------------------------------------------------------------------------------------------------------------------------------------------------------------------------------------------------------------------------------------------------------------------------------------------------------------------------------------------------------------------------------------------------------------------------------------------------------|------------------------------------------------------------------------------------------------------------------------------------------------------------------------------------------------------------------------|
| Wilkinson et al. (2012)[46]<br><br>USA | Intervention study (RCT)                                   | 452 <i>breast and prostate</i> cancer survivors within 9 months of diagnosis<br><br>Intervention: n = 224<br>Control: n = 228<br><br>53.7% female | <i>Intra-individual:</i> Cancer coping style (15-item version of Mini-MAC was used to classify participants as fighting-spirits, fatalist or other) | Dietary changes assessed with a modified version of the National Cancer Institute Diet History Questionnaire.<br><br>Baseline: >= 5 daily servings of fruit and vegetables 51.3% (n=322) | <i>Intra-individual:</i> Several differences by coping style were observed among standardized intervention participants. At year 1, fatalists reported more servings of <i>fruit and vegetables/day</i> than the fighting-spirits (p<0.01), though this difference did not result in a higher proportion achieving goal behavior.<br><br>By year 2, fatalists not only reported more fruit and vegetables than the fighting-spirits (p<0.01), a higher proportion also met the fruit and vegetable goal (p<0.05). | Alpha-carotene assays, indicative of fruit and vegetable intake, were performed on plasma obtained from a 25% subsample at all three time-points and showed a significant association with fruit and vegetable intake. |
|                                        | 1-year tailored intervention vs. standardized intervention | Mean (SD) age at diagnosis 57.9 (10.6) years; Range 22-85<br><br>BMI<br>25.0-29.9: 37.7%<br>>30.0: 24.8%                                          | Follow-up at completion of the interventions (1 year) and after an additional year long observation period (2 years)                                | Mean daily fruit and vegetable consumption 5.6 (SD 2.9)                                                                                                                                  | No differences were observed between <i>fat intake</i> or achieving the fat consumption goal and coping style among control participants throughout the study.                                                                                                                                                                                                                                                                                                                                                    |                                                                                                                                                                                                                        |
|                                        |                                                            |                                                                                                                                                   |                                                                                                                                                     | Low fat diet (<30% of kcal) 17.2% (n=108)                                                                                                                                                |                                                                                                                                                                                                                                                                                                                                                                                                                                                                                                                   |                                                                                                                                                                                                                        |
|                                        |                                                            |                                                                                                                                                   |                                                                                                                                                     |                                                                                                                                                                                          | The proportion of fatalists in the standardized intervention group                                                                                                                                                                                                                                                                                                                                                                                                                                                |                                                                                                                                                                                                                        |

---

meeting the *fruit and vegetable* goals continued to increase through year 2, whereas the proportion of fighting-spirits meeting these goals peaked at year 1 and then declined.

---
