# Supplementary material for: Psychosocial Determinants of Lifestyle Change after a Cancer Diagnosis: A Systematic Review of the Literature
Source: Cancers (Basel). 2022 Apr 16;14(8):2026. doi: 10.3390/cancers14082026 (PMC9032592; doi:10.3390/cancers14082026)
Supplement: Supplementary file 1 [file cancers-14-02026-s001.zip]

Archive with 10 entries (10 files):
- Table S10_MH.pdf
- Table S1_MH.pdf
- Table S2_MH.pdf
- Table S3_MH.pdf
- Table S4_MH.pdf
- Table S5_MH.pdf
- Table S6_MH.pdf
- Table S7_MH.pdf
- Table S8_MH.pdf
- Table S9_MH.pdf
